# Supplementary material for: Pt(ii)-Catalyzed photosynthesis for H2 evolution cycling between singly and triply reduced species
Source: Royal Society of Chemistry journal article supplement (doi:10.1039/c5cc03558a), 2015-01-01
Supplement: c5cc03558a1.pdf [file c5cc03558a1.pdf]

## Supporting Information

### **Pt(II)-Catalyzed Photosynthesis for H<sub>2</sub> Evolution Cycling Between Singly and Triply Reduced Species**

Keiya Yamamoto,<sup>a</sup> Kyoji Kitamoto,<sup>a,b</sup> Kosei Yamauchi,<sup>a,b</sup> and Ken Sakai<sup>\*a,b,c</sup>

<sup>a</sup>*Department of Chemistry, Faculty of Sciences, Kyushu University, 6-10-1 Hakozaki, Higashi-ku, Fukuoka 812-8581, Japan.*

<sup>b</sup>*International Institute for Carbon-Neutral Energy Research (WPI-I2CNER), Kyushu University, 744 Moto-oka, Nishi-ku, Fukuoka 819-0395, Japan.*

<sup>c</sup>*Center for Molecular Systems (CMS), Kyushu University, 744 Moto-oka Nishi-ku, Fukuoka 819-0395, Japan.*

\*E-mail: ksakai@chem.kyushu-univ.jp

## Experimental Section

### Materials

N,N'-Dicyclohexylcarbodiimide (DCC), N-hydroxysuccinimide (NHS), and N,N'-dimethyl-4-aminopyridine (DMAP) were purchased from Watanabe Chemical Industries. All other chemicals and solvents were purchased from Kanto Chemicals Co., Inc. and used without further purification. 4,4'-Dicarboxy-2,2'-bipyridine (dcbpy),<sup>S1</sup> 1-(2-aminoethyl)-1'-methyl-4,4'-bipyridinium hexafluorophosphate,<sup>S2</sup> *cis*-PtCl<sub>2</sub>(DMSO)<sub>2</sub> (DMSO = dimethylsulfoxide),<sup>S3</sup> PtCl<sub>2</sub>(dcbpy)<sup>S4</sup> and [Ru(bpy)<sub>3</sub>](NO<sub>3</sub>)<sub>2</sub>•3H<sub>2</sub>O<sup>S5</sup> were synthesized as previously described.

### General Methods

UV-Vis and UV-Vis-NIR spectra were recorded on a Shimadzu UV-2600 and a Shimadzu UV-3600 spectrophotometer, respectively. Luminescence spectra were recorded on a Shimadzu RF5300PC spectrofluorophotometer. Low temperature emission spectra were measured for the glassy 77-K solution of each system contained in a quartz EPR tube. Emission decays were recorded on a HORIBA FluoroCube 3000USKU. The excitation source was a diode laser (374 nm) (HORIBA N-375L). <sup>1</sup>H NMR spectra were acquired on a JEOL JNM-ESA 600 spectrometer. Square wave voltammograms were recorded on a BAS ALS Model 602DKM electrochemical analyzer, using a three electrode system consisting of a platinum working electrode, a platinum wire counter electrode, and a Ag/Ag<sup>+</sup> reference electrode (0.249 V vs. SCE), where TBAP (tetra(n-butyl)ammonium perchlorate) was used as a supporting electrolyte and all potentials reported are given relative to the Fc/Fc<sup>+</sup> couple (Fc/Fc<sup>+</sup> = 0.155 vs SCE).

### Synthesis of bpyMV2(PF<sub>6</sub>)<sub>4</sub>•2H<sub>2</sub>O

A solution of 4,4'-dicarboxy-2,2'-bipyridine (501 mg, 2.05 mmol) in dry DMF (N,N-dimethylformamide) (20 mL) was stirred in the presence of DCC (282 mg, 4.12 mmol) and NHS (475 mg, 4.13 mmol) at 40 °C for 15 h. Then, the reaction mixture was filtered for the removal of insoluble materials. Ethanol (20 mL) and hexane (60 mL) were added to the filtrate. The resulting white solid was collected by filtration and dried in vacuo (4,4'-dicarboxysuccinimidyl-2,2'-bipyridine, 605 mg, 67.3 %). 1-(2-Aminoethyl)-1'-methyl-4,4'-bipyridinium hexafluorophosphate (405 mg, 0.801 mmol) and DMAP (98.4 mg, 0.805 mmol) were dissolved in dry DMF (2 mL), and the solution was added into a solution of 4,4'-dicarboxysuccinimidyl-2,2'-bipyridine (162 mg, 0.368 mmol) in dry DMF (6 mL). The solution was stirred at 30 °C for 12 h. Then, the total volume of the solution was reduced to ca. 2 mL under reduced pressure, followed by addition of water (ca. 10 mL) to

give the product as a pale pink solid. The product was redissolved in a mixture of water (5 mL) and acetone (5 mL) at 50 °C. Then the solution was left in air overnight to promote gradual evaporation of acetone to re-precipitate the final product, which was collected and dried in vacuo (yield: 358 mg, 77.4 %). <sup>1</sup>H NMR (CD<sub>3</sub>CN/TMS, ppm): δ 8.95 (d, *J* = 6.8 Hz, 4H), 8.83 (d, *J* = 6.9 Hz, 4H), 8.79 (d, *J* = 5.0 Hz, 2H), 8.69 (s, 2H), 8.38-8.35 (m, 8H), 7.67-7.62 (m, 4H), 4.83 (t, *J* = 5.6 Hz, 4H), 4.39 (s, 6H), 4.01 (m, 4H); Anal. Calcd for C<sub>38</sub>H<sub>42</sub>F<sub>24</sub>N<sub>8</sub>O<sub>4</sub>P<sub>4</sub> • 2H<sub>2</sub>O (1254.65): C, 36.38; H, 3.37; N, 8.93. Found: C, 36.39; H, 3.39; N, 9.03.

### Synthesis of [PtCl<sub>2</sub>(bpyMV2)](PF<sub>6</sub>)<sub>4</sub>•2H<sub>2</sub>O

This was prepared by refluxing a solution of *cis*-PtCl<sub>2</sub>(DMSO)<sub>2</sub> (70.1 mg, 0.166 mmol) and **bpyMV2**(PF<sub>6</sub>)<sub>4</sub>•2H<sub>2</sub>O (201 mg, 0.160 mmol) in methanol (30 mL) for 11 h. After cooling down to room temperature, the resulting yellow solid was collected by filtration and recrystallized from a water/acetone mixture as described above for **bpyMV2**(PF<sub>6</sub>)<sub>4</sub>•2H<sub>2</sub>O (yield: 134 mg, 53.2 %). <sup>1</sup>H NMR (CD<sub>3</sub>CN/TMS, ppm): δ 9.87 (d, *J* = 6.2 Hz, 2H), 8.95 (d, *J* = 6.9 Hz, 4H), 8.85 (d, *J* = 6.9 Hz, 4H), 8.57 (s, 2H), 8.40 (d, *J* = 6.8 Hz, 4H), 8.37 (d, *J* = 6.9 Hz, 4H), 7.85 (dd, *J* = 6.2, 1.6 Hz, 2H), 7.79 (s, 2H), 4.86 (t, *J* = 5.5 Hz, 4H), 4.40 (s, 6H), 4.03 (m, 4H); Anal. Calcd for C<sub>38</sub>H<sub>42</sub>Cl<sub>2</sub>F<sub>24</sub>N<sub>8</sub>O<sub>4</sub>P<sub>4</sub>Pt•2H<sub>2</sub>O (1520.63): C, 30.01; H, 2.78; N, 7.37. Found: C, 30.01; H, 2.61; N, 7.36.

### Photolysis Experiments

The photoirradiation was carried out by an ILC Technology CERMAX LX-300 Xe lamp (300 W) equipped with a CM-1 cold mirror (400 < λ < 800 nm). Photolysis was carried out using Pyrex glass vials which eliminates the lights below ca. 350 nm. Other experimental details are all same to those reported elsewhere.<sup>S6</sup>

### DFT Calculations

Density functional theory (DFT) calculations were performed using the Gaussian 09 package of programs<sup>S7</sup> to better understand the structural and spin-state candidates for the π-dimers given by stacking of two singly reduced viologen moieties within the PHEMD reported herein. Calculations were also performed to simulate the UV-Vis-NIR absorption spectra of the candidates computed. The structures were fully optimized using the M06 hybrid functional, developed by Truhlar *et al.*<sup>S8-S10</sup> with the effect of solvation in water taken into consideration using the polarizable continuum model (PCM) method.<sup>S11-S13</sup> The SDD basis set was adopted for the Pt ion, while the 6-31G\*\* basis set was applied to the rest of atoms. The choice of 6-31G\*\* relies on our experience that calculations using the 6-31G\*\* basis set afford results essentially identical to those calculated using the 6-311+G(2d,p) basis set when this type of

aromatic-aromatic interactions are computed using the M06 hybrid functional. Spin-restricted and -unrestricted methods (i.e., M06 and UM06) were respectively employed for closed- and open-shell singlet states. Particularly, UM06 calculations (Guess=Mix) in broken symmetry (BS) were performed for the open-shell singlet states. For such BS singlet-state calculations, spin contamination is exhibited by nonzero values for the spin-squared expectation value, defined with  $\langle S^2 \rangle = S(S+1)$ , where S is the molecular spin quantum number. Actually, the spin-squared expectation value after spin annihilation was confirmed to be 0.00, showing that spin contamination of the triplet state is negligible. This supports the validity of the BS approach for the open-shell singlet state without employing the spin-projected methods eliminating the redundant spin contaminations. Moreover, this open-shell singlet-state calculation afforded results equivalent to those given in the closed-shell singlet-state calculation (see below). All stationary points were characterized by their harmonic vibrational frequencies as minima. The unscaled frequencies were used to compute the zero-point vibrational energy corrections to the energies. Electronic excited states were calculated by the TD-DFT method as implemented in Gaussian 09<sup>S14-S16</sup> with use of the M06 functional and the same basis sets described above (Fig. S10). We also tested the used of other functionals such as CAM-B3LYP, PBE0, B3PW91, and M06-2X (see Fig. S10), showing that the selection of M06 functional is valid within the scope our study here. The calculated transitions were replaced by a Gaussian broadening function with a full width at half maximum height of 0.2 eV to simulate the electronic transition spectrum. Molecular orbital pictures were generated using GaussView 5.0.<sup>S17</sup>

### Quantum Yield Determination

The quantum yield for the H<sub>2</sub> evolution from water photocatalyzed by [PtCl<sub>2</sub>(bpyMV2)]<sup>4+</sup> was determined using potassium ferrioxalate, K<sub>3</sub>[Fe(III)(C<sub>2</sub>O<sub>4</sub>)<sub>3</sub>], as a chemical actinometer.<sup>S18</sup> The light source was same to that described above. However, the wavelength region used in the actinometry was further diminished into the range 360-400 nm (see Fig. S11) by employing a combination of Asahi Spectra SU400 and SV490 band-path glass filters. The chemical actinometry was carried out under the condition which satisfies complete absorption of lights within this wavelength range (see Fig. S11). The photon flux was determined as 5.22 x 10<sup>-7</sup> einstein/s. The H<sub>2</sub> evolution rate under the steady state was determined as 2.677 x 10<sup>-11</sup> mol/s (Fig. S12). As a result, the apparent quantum yield for H<sub>2</sub> evolution was determined as Φ(0.5H<sub>2</sub>) = 0.010. This value was further corrected into the more meaningful value which defines Φ(0.5H<sub>2</sub>) on the basis of absorption at the MLCT band of the PtCl<sub>2</sub>(bpy) chromophore. The correction factor was estimated as 0.53 (see Fig. S11) by evaluating the absorption features of both non-reduced and two-electron-reduced forms of [PtCl<sub>2</sub>(bpyMV2)]<sup>4+</sup>.

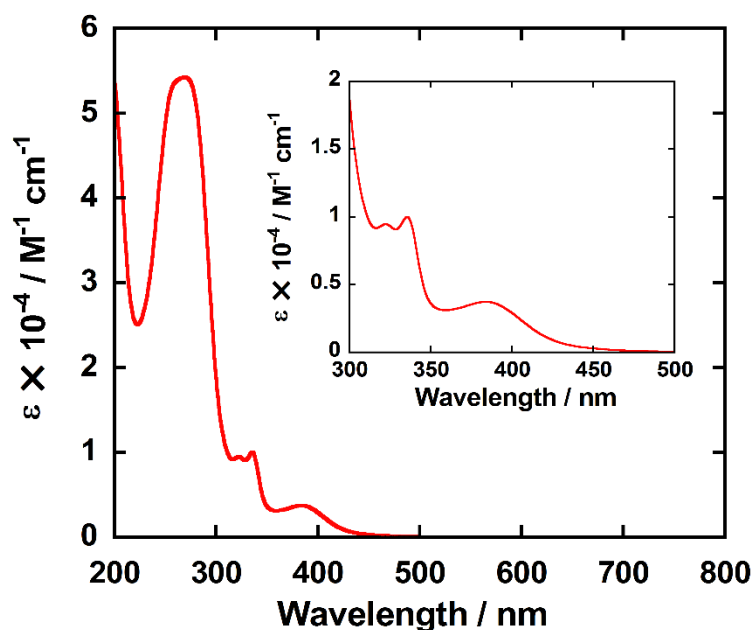

**Fig. S1** An absorption spectrum of  $[\text{PtCl}_2(\text{bpyMV}2)]^{4+}$  in an aqueous 0.1 M NaCl solution at 20 °C in air. The inset shows a magnification in the range 300-500 nm. The molar absorptivities at 270, 336, and 387 nm have been determined as 54200, 10000, and 3700  $\text{M}^{-1} \text{cm}^{-1}$ , respectively.

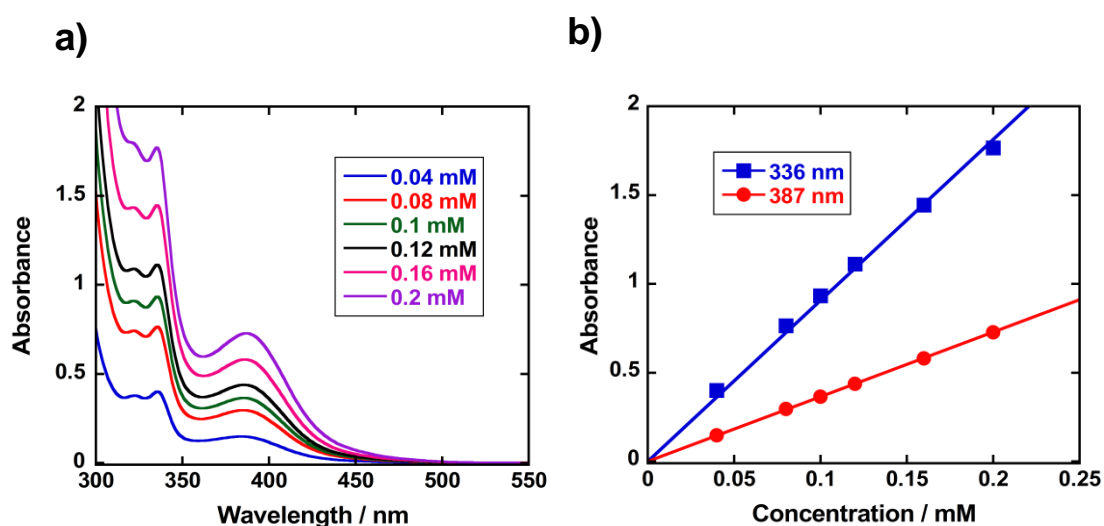

**Fig. S2** a) UV-Vis absorption spectra of  $[\text{PtCl}_2(\text{bpyMV}2)]^{4+}$  in an aqueous 0.1 M NaCl solution at various concentrations, at 20 °C in air. b) The concentration dependences of absorbance at two wavelengths in the concentration range of 0.04-0.2 mM, showing that they obey Beer's law and is thereby dimerization in solution is negligible.

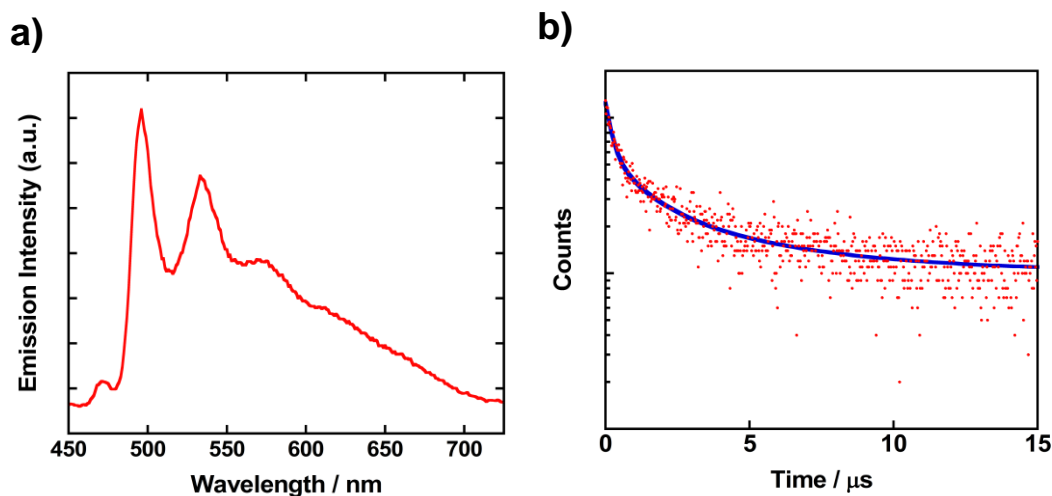

**Fig. S3** a) An emission spectrum of  $[\text{PtCl}_2(\text{bpyMV}_2)]^{4+}$  in MED glass at 77 K (excitation at 380 nm), where MED is a 4/4/1 (v/v/v) methanol/ethanol/DMF mixture. b) An emission decay profile of  $[\text{PtCl}_2(\text{bpyMV}_2)]^{4+}$  in MED glass at 77 K. The emission was monitored at 500 nm. The blue line shows a calculated one according to a triple exponential function.

**Table S1.** Emission wavelengths and lifetimes for  $[\text{PtCl}_2(\text{bpyMV}_2)]^{4+}$  in MED glass at 77 K.

| $\lambda_{\text{em}} / \text{nm}$ | Lifetimes <sup>a</sup>       | Relative contribution | $\langle \tau \rangle^b / \mu\text{s}$ |
|-----------------------------------|------------------------------|-----------------------|----------------------------------------|
| 496, 533,                         | $\tau_1 = 1.24 \mu\text{s}$  | $\chi_1 = 26.6 \%$    | 3.14 $\mu\text{s}$                     |
| 575, 612                          | $\tau_2 = 4.56 \mu\text{s}$  | $\chi_2 = 15.8 \%$    |                                        |
|                                   | $\tau_3 = 0.234 \mu\text{s}$ | $\chi_3 = 57.6 \%$    |                                        |

<sup>a</sup>Lifetimes were estimated by fitting the decay at 500 nm to a triple exponential function.

<sup>b</sup>Average lifetime  $\langle \tau \rangle$  was estimated using a definition of  $\langle \tau \rangle = \sum a_i \tau_i^2 / \sum a_i \tau_i$ , where  $a_i$  is the relative contribution of the corresponding lifetime  $\tau_i$ .<sup>S19</sup>

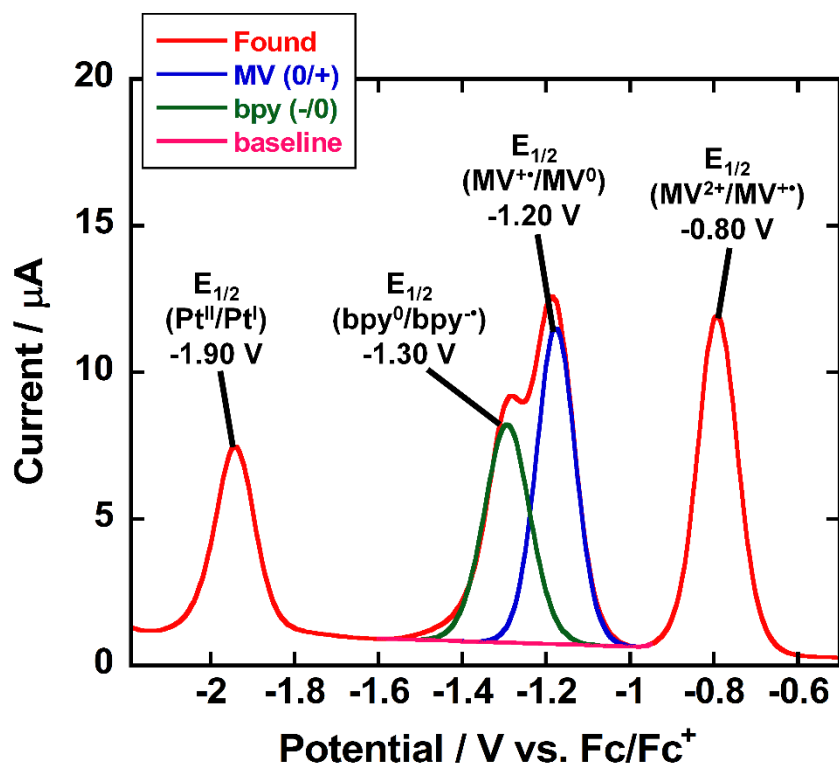

**Fig. S4** A square wave voltammogram of  $[\text{PtCl}_2(\text{bpyMV}_2)]^{4+}$  (1 mM) in a DMF solution containing 0.1 M TBAP at room temperature under Ar atmosphere. For each case, deconvolution was carried out for the potential range where the reduction peaks of viologen and bpy are overlapped ( $-0.95 \sim -1.6$  V vs.  $\text{Fc}/\text{Fc}^+$ ).

(a)

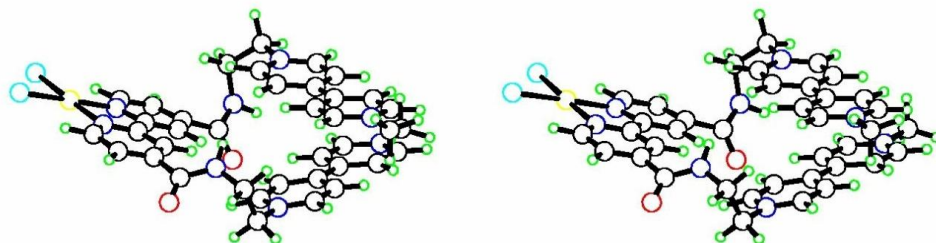

(b)

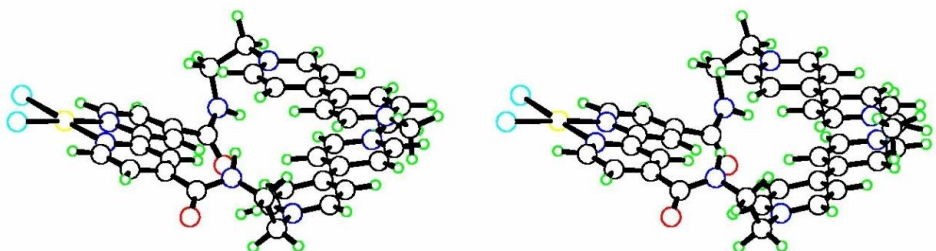

**Fig. S5** Stereo views showing the geometries for (a) the closed-shell singlet state and (b) the open-shell singlet state of the two-electron-reduced form of  $[\text{PtCl}_2(\text{bpyMV}_2)]^{4+}$ . The structures were optimized at the M06 and UM06 level of DFT calculations with the effect of water solvation taken into consideration using the polarizable continuum model (PCM) method, where the SDD basis set was used for Pt and the 6-31G\*\* basis set for H, C, N, O, and Cl.



**Table S2.** Geometry optimized by DFT for the closed-shell singlet state of the two-electron-reduced form of  $[\text{PtCl}_2(\text{bpyMV}_2)]^{4+}$ , i.e.,  $[\text{PtCl}_2(\text{bpy})-(\text{MV}^+)_2]^{2+}$ . Optimized at the M06/SDD(Pt)/6-31G\*\*(HCNOCl) level using PCM.<sup>a</sup>

| Atom | X         | Y         | Z         |
|------|-----------|-----------|-----------|
| Pt1  | -5.249545 | 0.228408  | 0.201542  |
| N2   | -3.542235 | 1.261716  | -0.293436 |
| C3   | -1.102116 | 2.417406  | -0.916936 |
| C4   | -2.436754 | 0.484640  | -0.426765 |
| C5   | -3.450680 | 2.584815  | -0.482337 |
| C6   | -2.246031 | 3.200367  | -0.788690 |
| C7   | -1.211133 | 1.042046  | -0.755438 |
| H8   | -4.376560 | 3.142772  | -0.373572 |
| H9   | -2.218195 | 4.276226  | -0.934150 |
| H10  | -0.326874 | 0.425648  | -0.887134 |
| N11  | -3.926446 | -1.330054 | 0.006783  |
| C12  | -1.941355 | -3.241449 | -0.276308 |
| C13  | -4.225969 | -2.635580 | 0.095807  |
| C14  | -2.649084 | -0.949614 | -0.241214 |
| C15  | -1.635468 | -1.888552 | -0.350821 |
| C16  | -3.264355 | -3.618227 | -0.070665 |
| H17  | -5.268965 | -2.865971 | 0.295146  |
| H18  | -0.615794 | -1.562670 | -0.532307 |
| H19  | -3.540451 | -4.667227 | -0.038607 |
| Cl20 | -6.620087 | 2.138628  | 0.361161  |
| Cl21 | -7.086147 | -1.125046 | 0.793697  |
| C22  | 0.236004  | 2.966253  | -1.322535 |
| C23  | -0.903180 | -4.285572 | -0.552521 |
| O24  | 0.869947  | 2.405067  | -2.210544 |
| O25  | -1.191904 | -5.301681 | -1.168229 |
| N26  | 0.663082  | 4.090645  | -0.698170 |
| H27  | 1.528015  | 4.461066  | -1.080117 |
| N28  | 0.354217  | -3.987409 | -0.135296 |
| H29  | 0.499149  | -3.230096 | 0.518255  |
| C30  | 0.290095  | 4.536328  | 0.633196  |

|     |           |           |           |
|-----|-----------|-----------|-----------|
| H31 | -0.550313 | 3.933429  | 0.986874  |
| H32 | -0.062407 | 5.573726  | 0.615503  |
| C33 | 1.454263  | 4.456920  | 1.611828  |
| H34 | 2.186595  | 5.238698  | 1.388581  |
| H35 | 1.080424  | 4.639161  | 2.626532  |
| C36 | 1.472917  | -4.828348 | -0.508183 |
| H37 | 2.221536  | -4.806834 | 0.290486  |
| H38 | 1.115346  | -5.857978 | -0.609781 |
| C39 | 2.085042  | -4.387699 | -1.832360 |
| H40 | 2.818028  | -5.122962 | -2.177313 |
| H41 | 1.305843  | -4.309504 | -2.598035 |
| N42 | 2.175749  | 3.180532  | 1.566808  |
| C43 | 3.609028  | 0.736601  | 1.615592  |
| C44 | 1.517038  | 1.978976  | 1.525085  |
| C45 | 3.539461  | 3.170105  | 1.598949  |
| C46 | 4.250036  | 2.008042  | 1.644175  |
| C47 | 2.181803  | 0.790818  | 1.523477  |
| H48 | 0.432251  | 2.025607  | 1.523173  |
| H49 | 4.026502  | 4.140683  | 1.616210  |
| H50 | 5.330088  | 2.098665  | 1.697041  |
| H51 | 1.576840  | -0.110832 | 1.489154  |
| C52 | 4.336968  | -0.482606 | 1.737513  |
| N53 | 5.778807  | -2.888551 | 2.087604  |
| C54 | 3.703820  | -1.757466 | 1.774662  |
| C55 | 5.759439  | -0.514822 | 1.884854  |
| C56 | 6.430812  | -1.690676 | 2.037298  |
| C57 | 4.423399  | -2.904663 | 1.939361  |
| H58 | 2.627428  | -1.860553 | 1.680976  |
| H59 | 6.351951  | 0.393185  | 1.894777  |
| H60 | 7.509823  | -1.731768 | 2.145981  |
| H61 | 3.955154  | -3.883320 | 1.986920  |
| N62 | 2.760640  | -3.091438 | -1.725625 |
| C63 | 4.068626  | -0.608168 | -1.394519 |
| C64 | 2.087709  | -1.915480 | -1.922491 |
| C65 | 4.069232  | -3.040184 | -1.345914 |
| C66 | 4.728783  | -1.854509 | -1.209001 |

|     |          |           |           |
|-----|----------|-----------|-----------|
| C67 | 2.688622 | -0.702082 | -1.755967 |
| H68 | 1.064384 | -2.010709 | -2.273831 |
| H69 | 4.561892 | -3.997361 | -1.194368 |
| H70 | 5.779681 | -1.905171 | -0.945873 |
| H71 | 2.090626 | 0.182983  | -1.964795 |
| C72 | 4.766024 | 0.637070  | -1.298242 |
| N73 | 6.167775 | 3.081714  | -1.177018 |
| C74 | 4.125230 | 1.890539  | -1.497575 |
| C75 | 6.168030 | 0.705820  | -1.035342 |
| C76 | 6.818968 | 1.902344  | -0.970919 |
| C77 | 4.827537 | 3.059708  | -1.422025 |
| H78 | 3.062278 | 1.967854  | -1.717944 |
| H79 | 6.767729 | -0.186173 | -0.894031 |
| H80 | 7.883409 | 1.973125  | -0.771503 |
| H81 | 4.360875 | 4.028996  | -1.571073 |
| C82 | 6.854366 | 4.359222  | -1.010633 |
| H83 | 6.676780 | 4.754878  | -0.004773 |
| H84 | 6.483276 | 5.071443  | -1.750398 |
| H85 | 7.925598 | 4.217797  | -1.159795 |
| C86 | 6.515760 | -4.145738 | 2.166768  |
| H87 | 7.496359 | -3.964950 | 2.609210  |
| H88 | 6.641530 | -4.575275 | 1.166982  |
| H89 | 5.967889 | -4.849958 | 2.796414  |

---

"Part of the Gaussian output file:

|                |           |                |            |          |
|----------------|-----------|----------------|------------|----------|
| SCF Done:      | E(RM06) = | -3097.51161660 | A.U. after | 6 cycles |
|                |           | 1              | 2          | 3        |
|                |           | A              | A          | A        |
| Frequencies -- |           | 23.3941        | 35.1806    | 41.5035  |
| Red. masses -- |           | 7.6593         | 5.8555     | 7.0154   |

|                                          |                             |
|------------------------------------------|-----------------------------|
| Zero-point correction=                   | 0.717285 (Hartree/Particle) |
| Thermal correction to Energy=            | 0.762366                    |
| Thermal correction to Enthalpy=          | 0.763310                    |
| Thermal correction to Gibbs Free Energy= | 0.641062                    |

Sum of electronic and zero-point Energies= -3096.794332  
Sum of electronic and thermal Energies= -3096.749250  
Sum of electronic and thermal Enthalpies= -3096.748306  
Sum of electronic and thermal Free Energies= -3096.870554

| Item          | Value    | Threshold | Converged? |
|---------------|----------|-----------|------------|
| Maximum Force | 0.000414 | 0.000450  | YES        |
| RMS Force     | 0.000056 | 0.000300  | YES        |

**Table S3.** Geometry optimized by DFT for the open-shell singlet state of the two-electron-reduced form of  $[\text{PtCl}_2(\text{bpyMV2})]^{4+}$ , i.e.,  $[\text{PtCl}_2(\text{bpy})-(\text{MV}^+)_2]^{2+}$ . Optimized at the UM06/SDD(Pt)/6-31G\*\*(HCNOCl) level of broken symmetry approach using PCM.<sup>a</sup>

| Atom | X         | Y         | Z         | Spin Density |
|------|-----------|-----------|-----------|--------------|
| Pt1  | -5.272313 | 0.227367  | 0.189126  | 0.000000     |
| N2   | -3.547715 | 1.269015  | -0.219298 | 0.000003     |
| C3   | -1.106439 | 2.426963  | -0.833064 | -0.000004    |
| C4   | -2.442930 | 0.491751  | -0.356777 | -0.000004    |
| C5   | -3.452869 | 2.594521  | -0.389175 | -0.000003    |
| C6   | -2.247281 | 3.211467  | -0.689031 | 0.000004     |
| C7   | -1.217036 | 1.050732  | -0.680656 | 0.000004     |
| H8   | -4.378712 | 3.152063  | -0.277798 | 0.000000     |
| H9   | -2.218136 | 4.288612  | -0.824473 | 0.000000     |
| H10  | -0.334337 | 0.434955  | -0.824071 | 0.000000     |
| N11  | -3.940610 | -1.327754 | 0.025013  | -0.000002    |
| C12  | -1.945760 | -3.234947 | -0.225394 | 0.000002     |
| C13  | -4.238948 | -2.634201 | 0.103299  | 0.000002     |
| C14  | -2.657830 | -0.944269 | -0.189357 | 0.000002     |
| C15  | -1.640356 | -1.881094 | -0.283592 | -0.000003    |
| C16  | -3.272037 | -3.614117 | -0.046626 | -0.000003    |
| H17  | -5.285600 | -2.868242 | 0.277389  | 0.000000     |
| H18  | -0.617776 | -1.551111 | -0.440918 | 0.000000     |
| H19  | -3.547119 | -4.663634 | -0.025100 | 0.000000     |
| Cl20 | -6.642581 | 2.140434  | 0.340110  | 0.000000     |
| Cl21 | -7.144680 | -1.139864 | 0.625737  | 0.000000     |
| C22  | 0.225783  | 2.973078  | -1.260827 | 0.000001     |
| C23  | -0.905757 | -4.279190 | -0.495078 | 0.000000     |
| O24  | 0.843896  | 2.407168  | -2.156926 | 0.000000     |
| O25  | -1.193891 | -5.296027 | -1.110154 | 0.000000     |
| N26  | 0.661841  | 4.102507  | -0.652083 | 0.000000     |
| H27  | 1.518044  | 4.473422  | -1.052750 | 0.000000     |
| N28  | 0.351950  | -3.983078 | -0.077322 | 0.000000     |
| H29  | 0.500676  | -3.226370 | 0.576190  | 0.000000     |
| C30  | 0.321745  | 4.543045  | 0.689953  | 0.000000     |

|     |           |           |           |           |
|-----|-----------|-----------|-----------|-----------|
| H31 | -0.507666 | 3.936793  | 1.063583  | 0.000000  |
| H32 | -0.033813 | 5.579502  | 0.684521  | 0.000000  |
| C33 | 1.512039  | 4.464614  | 1.636029  | 0.000000  |
| H34 | 2.239089  | 5.244001  | 1.388103  | 0.000000  |
| H35 | 1.167485  | 4.651869  | 2.660176  | 0.000000  |
| C36 | 1.467558  | -4.827531 | -0.452601 | 0.000000  |
| H37 | 2.224027  | -4.796405 | 0.338146  | 0.000000  |
| H38 | 1.110363  | -5.858659 | -0.539400 | 0.000000  |
| C39 | 2.066927  | -4.401672 | -1.787596 | 0.000000  |
| H40 | 2.795740  | -5.141624 | -2.131127 | 0.000000  |
| H41 | 1.281058  | -4.331063 | -2.547100 | 0.000000  |
| N42 | 2.230017  | 3.186449  | 1.575761  | 0.000000  |
| C43 | 3.661551  | 0.740585  | 1.603094  | 0.000001  |
| C44 | 1.570201  | 1.985351  | 1.536158  | 0.000001  |
| C45 | 3.594073  | 3.174466  | 1.591974  | 0.000001  |
| C46 | 4.304052  | 2.011584  | 1.625239  | -0.000002 |
| C47 | 2.233346  | 0.796318  | 1.526252  | -0.000001 |
| H48 | 0.485642  | 2.032448  | 1.543989  | 0.000000  |
| H49 | 4.082217  | 4.144649  | 1.604987  | 0.000000  |
| H50 | 5.384861  | 2.100715  | 1.663672  | 0.000000  |
| H51 | 1.626113  | -0.104222 | 1.495797  | 0.000000  |
| C52 | 4.389956  | -0.479005 | 1.714974  | 0.000001  |
| N53 | 5.833368  | -2.886303 | 2.047980  | 0.000000  |
| C54 | 3.755279  | -1.752513 | 1.767740  | -0.000002 |
| C55 | 5.814962  | -0.513263 | 1.835689  | -0.000001 |
| C56 | 6.486621  | -1.689819 | 1.980612  | 0.000001  |
| C57 | 4.475491  | -2.900403 | 1.924087  | 0.000002  |
| H58 | 2.677047  | -1.852742 | 1.693502  | 0.000000  |
| H59 | 6.409493  | 0.393502  | 1.830018  | 0.000000  |
| H60 | 7.567383  | -1.732675 | 2.069284  | 0.000000  |
| H61 | 4.006450  | -3.878034 | 1.983455  | 0.000000  |
| N62 | 2.744966  | -3.105238 | -1.701881 | 0.000000  |
| C63 | 4.055381  | -0.619222 | -1.404802 | 0.000001  |
| C64 | 2.067289  | -1.931140 | -1.892042 | 0.000001  |
| C65 | 4.060560  | -3.050901 | -1.347959 | 0.000001  |
| C66 | 4.721162  | -1.863706 | -1.229047 | -0.000001 |

|     |          |           |           |           |
|-----|----------|-----------|-----------|-----------|
| C67 | 2.669197 | -0.716310 | -1.739931 | -0.000001 |
| H68 | 1.038599 | -2.027852 | -2.226468 | 0.000000  |
| H69 | 4.557375 | -4.006760 | -1.201788 | 0.000000  |
| H70 | 5.776762 | -1.911715 | -0.985046 | 0.000000  |
| H71 | 2.067226 | 0.167259  | -1.942992 | 0.000000  |
| C72 | 4.751582 | 0.628070  | -1.325397 | 0.000000  |
| N73 | 6.149014 | 3.075979  | -1.249109 | 0.000000  |
| C74 | 4.100240 | 1.879471  | -1.500203 | -0.000001 |
| C75 | 6.160570 | 0.700274  | -1.104861 | 0.000000  |
| C76 | 6.809769 | 1.898727  | -1.062522 | 0.000000  |
| C77 | 4.801081 | 3.050686  | -1.447296 | 0.000001  |
| H78 | 3.028307 | 1.952689  | -1.673399 | 0.000000  |
| H79 | 6.766772 | -0.190014 | -0.981621 | 0.000000  |
| H80 | 7.879826 | 1.972849  | -0.897703 | 0.000000  |
| H81 | 4.326828 | 4.019165  | -1.576965 | 0.000000  |
| C82 | 6.837994 | 4.355171  | -1.108229 | 0.000000  |
| H83 | 6.688599 | 4.754820  | -0.099347 | 0.000000  |
| H84 | 6.445318 | 5.063642  | -1.840474 | 0.000000  |
| H85 | 7.904747 | 4.214322  | -1.287194 | 0.000000  |
| C86 | 6.569937 | -4.144245 | 2.117913  | 0.000000  |
| H87 | 7.556796 | -3.964178 | 2.546573  | 0.000000  |
| H88 | 6.681443 | -4.575008 | 1.116973  | 0.000000  |
| H89 | 6.030261 | -4.847405 | 2.755702  | 0.000000  |

---

"Part of the Gaussian output file:

SCF Done: E(UM06) = -3097.51162153 A.U. after 29 cycles

Annihilation of the first spin contaminant:

S\*\*2 before annihilation 0.0000, after 0.0000

|                | 1       | 2       | 3       |
|----------------|---------|---------|---------|
|                | A       | A       | A       |
| Frequencies -- | 18.4220 | 34.2255 | 36.9745 |
| Red. masses -- | 7.6063  | 5.8037  | 6.6053  |

Zero-point correction= 0.716808 (Hartree/Particle)

|                                              |              |
|----------------------------------------------|--------------|
| Thermal correction to Energy=                | 0.762144     |
| Thermal correction to Enthalpy=              | 0.763088     |
| Thermal correction to Gibbs Free Energy=     | 0.639537     |
| Sum of electronic and zero-point Energies=   | -3096.794814 |
| Sum of electronic and thermal Energies=      | -3096.749477 |
| Sum of electronic and thermal Enthalpies=    | -3096.748533 |
| Sum of electronic and thermal Free Energies= | -3096.872084 |

| Item          | Value    | Threshold | Converged? |
|---------------|----------|-----------|------------|
| Maximum Force | 0.000096 | 0.000450  | YES        |
| RMS Force     | 0.000014 | 0.000300  | YES        |



**Table S4.** Electronic transitions computed by TD-DFT for the closed-shell singlet state of  $[\text{PtCl}_2(\text{bpy})-(\text{MV}^+)_2]^{2+}$ , for which part of the Gaussian output is shown. Relevant MO's are shown below:

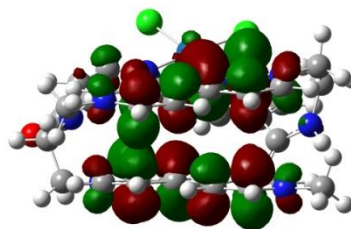

MO203 (LUMO+8)

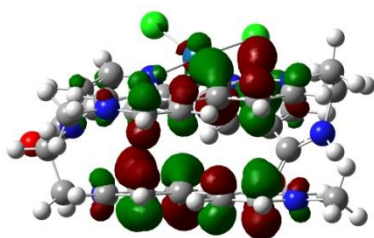

MO202(LUMO+7)

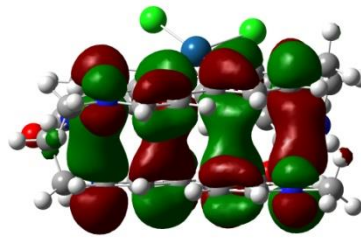

MO200 (LUMO+5)

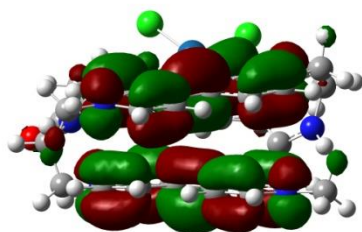

MO196 (LUMO+1)

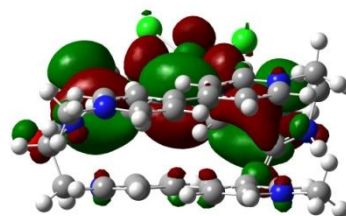

MO195 (LUMO)

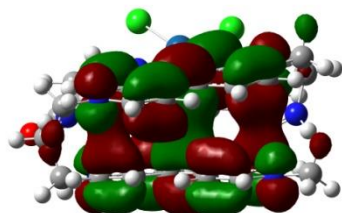

MO194 (HOMO)

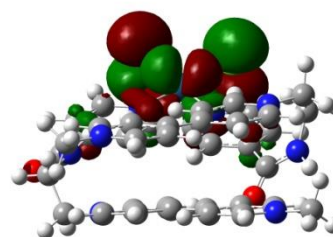

MO193 (HOMO-1)

---

Excitation energies and oscillator strengths ( $\lambda > 210$  nm,  $f > 0.02$  only):

|               |           |           |           |           |            |                                |
|---------------|-----------|-----------|-----------|-----------|------------|--------------------------------|
| Excited State | 2:        | Singlet-A | 1.4502 eV | 854.92 nm | $f=0.1872$ | $\langle S^{*2} \rangle=0.000$ |
|               | 194 ->195 | 0.13260   |           |           |            |                                |
|               | 194 ->196 | 0.72995   |           |           |            |                                |
|               | 194 ->196 | -0.22548  |           |           |            |                                |
| Excited State | 7:        | Singlet-A | 2.4345 eV | 509.27 nm | $f=0.0812$ | $\langle S^{*2} \rangle=0.000$ |
|               | 194 ->200 | 0.56687   |           |           |            |                                |
|               | 194 ->202 | 0.25317   |           |           |            |                                |
|               | 194 ->203 | -0.31311  |           |           |            |                                |
| Excited State | 10:       | Singlet-A | 2.8913 eV | 428.82 nm | $f=0.2370$ | $\langle S^{*2} \rangle=0.000$ |
|               | 189 ->196 | 0.15735   |           |           |            |                                |
|               | 193 ->195 | 0.24646   |           |           |            |                                |
|               | 194 ->200 | 0.35302   |           |           |            |                                |
|               | 194 ->202 | -0.33652  |           |           |            |                                |
|               | 194 ->203 | 0.38995   |           |           |            |                                |
| Excited State | 14:       | Singlet-A | 3.1946 eV | 388.10 nm | $f=0.0470$ | $\langle S^{*2} \rangle=0.000$ |
|               | 192 ->195 | 0.27404   |           |           |            |                                |
|               | 192 ->199 | -0.23522  |           |           |            |                                |
|               | 194 ->205 | 0.16930   |           |           |            |                                |
|               | 194 ->206 | 0.14194   |           |           |            |                                |
|               | 194 ->207 | 0.53957   |           |           |            |                                |
| Excited State | 15:       | Singlet-A | 3.1976 eV | 387.75 nm | $f=0.0427$ | $\langle S^{*2} \rangle=0.000$ |
|               | 192 ->195 | 0.39556   |           |           |            |                                |
|               | 192 ->198 | 0.12800   |           |           |            |                                |
|               | 192 ->199 | -0.37003  |           |           |            |                                |
|               | 194 ->206 | -0.10244  |           |           |            |                                |
|               | 194 ->207 | -0.36886  |           |           |            |                                |
| Excited State | 17:       | Singlet-A | 3.2522 eV | 381.24 nm | $f=0.0991$ | $\langle S^{*2} \rangle=0.000$ |
|               | 190 ->199 | 0.21045   |           |           |            |                                |
|               | 192 ->195 | 0.44169   |           |           |            |                                |
|               | 192 ->198 | -0.10408  |           |           |            |                                |
|               | 192 ->199 | 0.44818   |           |           |            |                                |
| Excited State | 20:       | Singlet-A | 3.3043 eV | 375.23 nm | $f=0.1525$ | $\langle S^{*2} \rangle=0.000$ |
|               | 192 ->195 | -0.10441  |           |           |            |                                |
|               | 194 ->201 | 0.11715   |           |           |            |                                |
|               | 194 ->202 | 0.10759   |           |           |            |                                |
|               | 194 ->205 | 0.62780   |           |           |            |                                |
|               | 194 ->207 | -0.16714  |           |           |            |                                |
| Excited State | 25:       | Singlet-A | 3.9412 eV | 314.59 nm | $f=0.0302$ | $\langle S^{*2} \rangle=0.000$ |
|               | 185 ->195 | 0.11139   |           |           |            |                                |
|               | 186 ->195 | 0.19199   |           |           |            |                                |
|               | 187 ->195 | 0.39525   |           |           |            |                                |
|               | 188 ->195 | 0.21718   |           |           |            |                                |
|               | 189 ->196 | 0.33561   |           |           |            |                                |

|                   |           |           |           |          |              |  |
|-------------------|-----------|-----------|-----------|----------|--------------|--|
| 192 ->197         | 0.12963   |           |           |          |              |  |
| 193 ->198         | 0.24315   |           |           |          |              |  |
| Excited State 26: | Singlet-A | 3.9546 eV | 313.52 nm | f=0.0637 | <S**2>=0.000 |  |
| 188 ->195         | 0.60891   |           |           |          |              |  |
| 188 ->196         | -0.12150  |           |           |          |              |  |
| 189 ->196         | -0.25207  |           |           |          |              |  |
| 190 ->196         | 0.11914   |           |           |          |              |  |
| Excited State 27: | Singlet-A | 3.9736 eV | 312.02 nm | f=0.4776 | <S**2>=0.000 |  |
| 186 ->195         | -0.13235  |           |           |          |              |  |
| 187 ->195         | -0.22591  |           |           |          |              |  |
| 188 ->195         | 0.17568   |           |           |          |              |  |
| 189 ->195         | 0.15132   |           |           |          |              |  |
| 189 ->196         | 0.48473   |           |           |          |              |  |
| 192 ->197         | -0.16174  |           |           |          |              |  |
| 193 ->198         | -0.22791  |           |           |          |              |  |
| 194 ->200         | -0.11578  |           |           |          |              |  |
| Excited State 29: | Singlet-A | 4.0494 eV | 306.18 nm | f=0.0601 | <S**2>=0.000 |  |
| 187 ->195         | -0.11836  |           |           |          |              |  |
| 192 ->197         | -0.35889  |           |           |          |              |  |
| 193 ->197         | 0.50389   |           |           |          |              |  |
| 193 ->198         | 0.20574   |           |           |          |              |  |
| 193 ->199         | 0.13360   |           |           |          |              |  |
| Excited State 30: | Singlet-A | 4.0965 eV | 302.66 nm | f=0.0480 | <S**2>=0.000 |  |
| 189 ->195         | 0.19166   |           |           |          |              |  |
| 191 ->197         | -0.32121  |           |           |          |              |  |
| 192 ->197         | 0.28757   |           |           |          |              |  |
| 192 ->198         | -0.13613  |           |           |          |              |  |
| 193 ->197         | 0.33331   |           |           |          |              |  |
| 193 ->198         | -0.31736  |           |           |          |              |  |
| Excited State 31: | Singlet-A | 4.1072 eV | 301.87 nm | f=0.0264 | <S**2>=0.000 |  |
| 183 ->195         | -0.13460  |           |           |          |              |  |
| 189 ->195         | 0.58461   |           |           |          |              |  |
| 189 ->196         | -0.13342  |           |           |          |              |  |
| 192 ->197         | -0.13296  |           |           |          |              |  |
| 193 ->197         | -0.11032  |           |           |          |              |  |
| 193 ->198         | 0.20900   |           |           |          |              |  |
| Excited State 36: | Singlet-A | 4.1796 eV | 296.64 nm | f=0.1873 | <S**2>=0.000 |  |
| 185 ->196         | -0.25707  |           |           |          |              |  |
| 186 ->195         | 0.14450   |           |           |          |              |  |
| 186 ->196         | 0.54293   |           |           |          |              |  |
| 187 ->196         | -0.22079  |           |           |          |              |  |
| 194 ->209         | 0.14285   |           |           |          |              |  |
| Excited State 37: | Singlet-A | 4.2056 eV | 294.81 nm | f=0.1564 | <S**2>=0.000 |  |
| 181 ->195         | 0.17382   |           |           |          |              |  |
| 182 ->195         | -0.16219  |           |           |          |              |  |
| 184 ->195         | 0.43959   |           |           |          |              |  |
| 184 ->197         | -0.11246  |           |           |          |              |  |

|                   |           |           |           |          |              |  |
|-------------------|-----------|-----------|-----------|----------|--------------|--|
| 187 ->195         | -0.22495  |           |           |          |              |  |
| 192 ->197         | 0.19270   |           |           |          |              |  |
| 193 ->198         | 0.22864   |           |           |          |              |  |
| Excited State 38: | Singlet-A | 4.2359 eV | 292.70 nm | f=0.1022 | <S**2>=0.000 |  |
| 182 ->196         | 0.11883   |           |           |          |              |  |
| 185 ->195         | 0.15382   |           |           |          |              |  |
| 185 ->196         | 0.53940   |           |           |          |              |  |
| 187 ->195         | -0.10857  |           |           |          |              |  |
| 187 ->196         | -0.33732  |           |           |          |              |  |
| Excited State 40: | Singlet-A | 4.2568 eV | 291.26 nm | f=0.0225 | <S**2>=0.000 |  |
| 183 ->195         | -0.16639  |           |           |          |              |  |
| 191 ->198         | 0.21499   |           |           |          |              |  |
| 192 ->198         | 0.56101   |           |           |          |              |  |
| 192 ->199         | 0.16712   |           |           |          |              |  |
| 193 ->197         | 0.14992   |           |           |          |              |  |
| Excited State 41: | Singlet-A | 4.3157 eV | 287.29 nm | f=0.2479 | <S**2>=0.000 |  |
| 181 ->195         | 0.13261   |           |           |          |              |  |
| 183 ->195         | 0.10941   |           |           |          |              |  |
| 184 ->195         | 0.34748   |           |           |          |              |  |
| 185 ->195         | -0.12275  |           |           |          |              |  |
| 186 ->195         | -0.15338  |           |           |          |              |  |
| 187 ->195         | 0.37315   |           |           |          |              |  |
| 187 ->196         | -0.11302  |           |           |          |              |  |
| 192 ->197         | -0.23052  |           |           |          |              |  |
| 192 ->198         | 0.10932   |           |           |          |              |  |
| 193 ->198         | -0.17625  |           |           |          |              |  |
| Excited State 43: | Singlet-A | 4.3381 eV | 285.80 nm | f=0.0228 | <S**2>=0.000 |  |
| 185 ->195         | -0.19773  |           |           |          |              |  |
| 186 ->195         | -0.19731  |           |           |          |              |  |
| 190 ->197         | 0.59230   |           |           |          |              |  |
| Excited State 44: | Singlet-A | 4.3454 eV | 285.32 nm | f=0.2207 | <S**2>=0.000 |  |
| 183 ->195         | 0.14940   |           |           |          |              |  |
| 184 ->195         | 0.11182   |           |           |          |              |  |
| 185 ->195         | 0.33909   |           |           |          |              |  |
| 186 ->195         | 0.33139   |           |           |          |              |  |
| 190 ->197         | 0.32244   |           |           |          |              |  |
| 192 ->197         | -0.20296  |           |           |          |              |  |
| 192 ->198         | 0.11105   |           |           |          |              |  |
| 193 ->198         | -0.17303  |           |           |          |              |  |
| Excited State 53: | Singlet-A | 4.5689 eV | 271.37 nm | f=0.0204 | <S**2>=0.000 |  |
| 180 ->196         | -0.22806  |           |           |          |              |  |
| 182 ->195         | 0.12242   |           |           |          |              |  |
| 182 ->196         | 0.54285   |           |           |          |              |  |
| 183 ->196         | -0.13978  |           |           |          |              |  |
| 184 ->196         | -0.10979  |           |           |          |              |  |
| 185 ->196         | -0.14179  |           |           |          |              |  |
| 186 ->196         | -0.12017  |           |           |          |              |  |
| 188 ->196         | 0.19163   |           |           |          |              |  |

|                    |           |           |           |          |              |
|--------------------|-----------|-----------|-----------|----------|--------------|
| Excited State 71:  | Singlet-A | 5.1208 eV | 242.12 nm | f=0.0273 | <S**2>=0.000 |
| 182 ->198          | -0.10203  |           |           |          |              |
| 184 ->198          | -0.10748  |           |           |          |              |
| 186 ->197          | -0.10896  |           |           |          |              |
| 187 ->198          | -0.28767  |           |           |          |              |
| 189 ->198          | 0.54854   |           |           |          |              |
| 189 ->199          | 0.10717   |           |           |          |              |
| Excited State 73:  | Singlet-A | 5.1443 eV | 241.01 nm | f=0.0449 | <S**2>=0.000 |
| 171 ->195          | 0.11634   |           |           |          |              |
| 175 ->195          | 0.10039   |           |           |          |              |
| 176 ->195          | -0.10811  |           |           |          |              |
| 177 ->199          | -0.16046  |           |           |          |              |
| 183 ->197          | -0.12701  |           |           |          |              |
| 183 ->198          | 0.25207   |           |           |          |              |
| 184 ->197          | 0.13654   |           |           |          |              |
| 185 ->198          | 0.17003   |           |           |          |              |
| 186 ->198          | 0.22471   |           |           |          |              |
| 187 ->198          | 0.28791   |           |           |          |              |
| 187 ->199          | 0.10989   |           |           |          |              |
| 189 ->198          | 0.25693   |           |           |          |              |
| Excited State 79:  | Singlet-A | 5.2095 eV | 238.00 nm | f=0.0520 | <S**2>=0.000 |
| 175 ->195          | -0.11632  |           |           |          |              |
| 176 ->195          | 0.51695   |           |           |          |              |
| 176 ->196          | -0.10518  |           |           |          |              |
| 178 ->195          | -0.13269  |           |           |          |              |
| 187 ->197          | -0.13295  |           |           |          |              |
| 193 ->200          | -0.28662  |           |           |          |              |
| Excited State 81:  | Singlet-A | 5.2547 eV | 235.95 nm | f=0.0264 | <S**2>=0.000 |
| 175 ->195          | 0.61121   |           |           |          |              |
| 175 ->196          | -0.12671  |           |           |          |              |
| 176 ->195          | 0.13361   |           |           |          |              |
| 187 ->198          | -0.11328  |           |           |          |              |
| Excited State 100: | Singlet-A | 5.4936 eV | 225.69 nm | f=0.0233 | <S**2>=0.000 |
| 176 ->198          | -0.10559  |           |           |          |              |
| 176 ->199          | 0.35573   |           |           |          |              |
| 184 ->197          | -0.19889  |           |           |          |              |
| 184 ->198          | 0.27638   |           |           |          |              |
| 184 ->199          | 0.12284   |           |           |          |              |
| 185 ->198          | 0.12195   |           |           |          |              |
| 190 ->202          | -0.28469  |           |           |          |              |
| 190 ->203          | -0.20308  |           |           |          |              |
| 191 ->202          | -0.10727  |           |           |          |              |
| Excited State 122: | Singlet-A | 5.7474 eV | 215.72 nm | f=0.0262 | <S**2>=0.000 |
| 170 ->195          | 0.17534   |           |           |          |              |
| 171 ->195          | -0.17895  |           |           |          |              |
| 183 ->199          | -0.22606  |           |           |          |              |
| 184 ->199          | -0.12980  |           |           |          |              |
| 185 ->199          | 0.44845   |           |           |          |              |

|                    |           |           |           |          |              |  |
|--------------------|-----------|-----------|-----------|----------|--------------|--|
| 186 ->199          | -0.30688  |           |           |          |              |  |
| Excited State 123: | Singlet-A | 5.7557 eV | 215.41 nm | f=0.0323 | <S**2>=0.000 |  |
| 169 ->195          | -0.11551  |           |           |          |              |  |
| 170 ->195          | 0.50766   |           |           |          |              |  |
| 170 ->196          | -0.10625  |           |           |          |              |  |
| 171 ->195          | -0.17786  |           |           |          |              |  |
| 177 ->197          | 0.13263   |           |           |          |              |  |
| 183 ->199          | 0.20068   |           |           |          |              |  |
| 185 ->199          | -0.15670  |           |           |          |              |  |
| 193 ->204          | 0.16807   |           |           |          |              |  |
| Excited State 127: | Singlet-A | 5.8140 eV | 213.25 nm | f=0.0502 | <S**2>=0.000 |  |
| 169 ->195          | -0.11762  |           |           |          |              |  |
| 170 ->195          | 0.27072   |           |           |          |              |  |
| 171 ->195          | 0.35159   |           |           |          |              |  |
| 174 ->195          | -0.11681  |           |           |          |              |  |
| 177 ->197          | -0.22213  |           |           |          |              |  |
| 181 ->197          | 0.14709   |           |           |          |              |  |
| 181 ->198          | -0.18132  |           |           |          |              |  |
| 183 ->199          | -0.14439  |           |           |          |              |  |
| 192 ->203          | -0.12740  |           |           |          |              |  |
| Excited State 128: | Singlet-A | 5.8304 eV | 212.65 nm | f=0.0267 | <S**2>=0.000 |  |
| 177 ->197          | 0.10133   |           |           |          |              |  |
| 185 ->201          | -0.10137  |           |           |          |              |  |
| 186 ->201          | 0.29988   |           |           |          |              |  |
| 187 ->201          | -0.15365  |           |           |          |              |  |
| 189 ->202          | 0.22556   |           |           |          |              |  |
| 189 ->203          | -0.27059  |           |           |          |              |  |
| 192 ->202          | 0.12745   |           |           |          |              |  |
| 192 ->203          | -0.17889  |           |           |          |              |  |
| 192 ->206          | -0.14323  |           |           |          |              |  |
| 194 ->220          | 0.11467   |           |           |          |              |  |
| 194 ->222          | -0.14318  |           |           |          |              |  |
| Excited State 129: | Singlet-A | 5.8325 eV | 212.58 nm | f=0.0646 | <S**2>=0.000 |  |
| 169 ->195          | 0.13767   |           |           |          |              |  |
| 177 ->197          | 0.29226   |           |           |          |              |  |
| 181 ->197          | -0.11582  |           |           |          |              |  |
| 181 ->198          | 0.11556   |           |           |          |              |  |
| 186 ->201          | -0.15764  |           |           |          |              |  |
| 189 ->202          | -0.12256  |           |           |          |              |  |
| 189 ->203          | 0.14726   |           |           |          |              |  |
| 192 ->202          | 0.20115   |           |           |          |              |  |
| 192 ->203          | -0.27739  |           |           |          |              |  |
| 192 ->206          | -0.22415  |           |           |          |              |  |
| 193 ->208          | 0.13232   |           |           |          |              |  |
| Excited State 132: | Singlet-A | 5.8491 eV | 211.97 nm | f=0.0516 | <S**2>=0.000 |  |
| 169 ->195          | 0.17319   |           |           |          |              |  |
| 171 ->195          | 0.16331   |           |           |          |              |  |
| 174 ->195          | -0.10835  |           |           |          |              |  |
| 177 ->197          | 0.29027   |           |           |          |              |  |

|           |          |
|-----------|----------|
| 179 ->197 | 0.18366  |
| 180 ->197 | 0.29529  |
| 192 ->202 | -0.12612 |
| 192 ->203 | 0.17836  |
| 192 ->206 | 0.17316  |
| 193 ->208 | -0.21806 |

---

**Table S5.** Electronic transitions computed by TD-DFT for the open-shell singlet state of  $[\text{PtCl}_2(\text{bpy})-(\text{MV}^+)_2]^{2+}$ , for which part of the Gaussian output is shown.

Relevant MO's (only  $\alpha$  orbitals) are shown below:

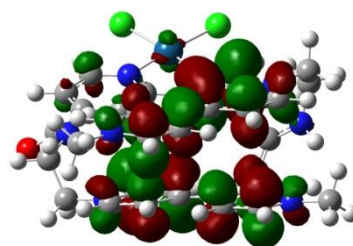

MO203 $\alpha$  (LUMO+8)

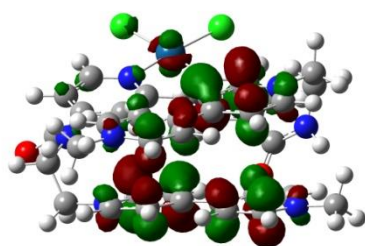

MO202 $\alpha$ (LUMO+7)

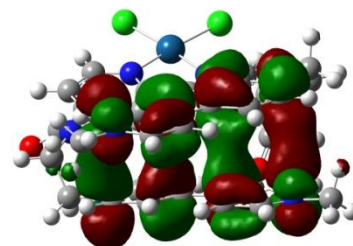

MO200 $\alpha$  (LUMO+5)

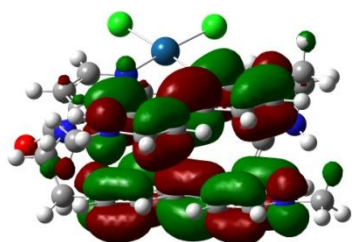

MO196 $\alpha$  (LUMO+1)

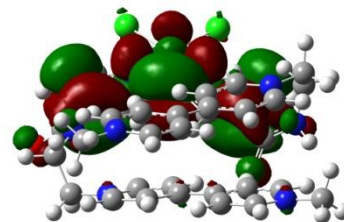

MO195 $\alpha$  (LUMO)

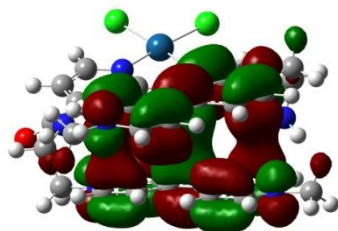

MO194 $\alpha$  (HOMO)

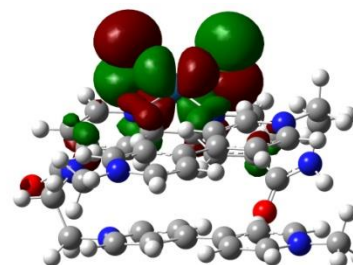

MO193 $\alpha$  (HOMO-1)



---

Excitation energies and oscillator strengths ( $\lambda > 210$  nm,  $f > 0.02$  only):

|                   |          |           |           |          |                                   |
|-------------------|----------|-----------|-----------|----------|-----------------------------------|
| Excited State 4:  | 1.000-A  | 1.4570 eV | 850.94 nm | f=0.1882 | $\langle S^{**2} \rangle = 0.000$ |
| 194A ->195A       | 0.10123  |           |           |          |                                   |
| 194A ->196A       | 0.73438  |           |           |          |                                   |
| 194B ->195B       | 0.10123  |           |           |          |                                   |
| 194B ->196B       | 0.73438  |           |           |          |                                   |
| 194A <-196A       | -0.22590 |           |           |          |                                   |
| 194B <-196B       | -0.22590 |           |           |          |                                   |
| Excited State 16: | 1.000-A  | 2.4340 eV | 509.38 nm | f=0.0832 | $\langle S^{**2} \rangle = 0.000$ |
| 194A ->200A       | 0.56867  |           |           |          |                                   |
| 194A ->202A       | 0.23914  |           |           |          |                                   |
| 194A ->203A       | -0.31837 |           |           |          |                                   |
| 194B ->200B       | 0.56867  |           |           |          |                                   |
| 194B ->202B       | 0.23914  |           |           |          |                                   |
| 194B ->203B       | -0.31836 |           |           |          |                                   |
| Excited State 26: | 1.000-A  | 2.8942 eV | 428.40 nm | f=0.2422 | $\langle S^{**2} \rangle = 0.000$ |
| 189A ->196A       | 0.16276  |           |           |          |                                   |
| 193A ->195A       | 0.20679  |           |           |          |                                   |
| 194A ->200A       | 0.35625  |           |           |          |                                   |
| 194A ->202A       | -0.33168 |           |           |          |                                   |
| 194A ->203A       | 0.41449  |           |           |          |                                   |
| 189B ->196B       | 0.16276  |           |           |          |                                   |
| 193B ->195B       | 0.20679  |           |           |          |                                   |
| 194B ->200B       | 0.35625  |           |           |          |                                   |
| 194B ->202B       | -0.33168 |           |           |          |                                   |
| 194B ->203B       | 0.41449  |           |           |          |                                   |
| Excited State 34: | 1.000-A  | 3.1891 eV | 388.78 nm | f=0.0749 | $\langle S^{**2} \rangle = 0.000$ |
| 192A ->195A       | 0.46399  |           |           |          |                                   |
| 192A ->198A       | 0.19114  |           |           |          |                                   |
| 192A ->199A       | -0.45986 |           |           |          |                                   |
| 192B ->195B       | 0.46399  |           |           |          |                                   |
| 192B ->198B       | 0.19113  |           |           |          |                                   |
| 192B ->199B       | -0.45986 |           |           |          |                                   |
| Excited State 38: | 1.000-A  | 3.2590 eV | 380.43 nm | f=0.1149 | $\langle S^{**2} \rangle = 0.000$ |
| 190A ->199A       | 0.10266  |           |           |          |                                   |
| 192A ->195A       | 0.47571  |           |           |          |                                   |
| 192A ->198A       | -0.13260 |           |           |          |                                   |
| 192A ->199A       | 0.44705  |           |           |          |                                   |
| 194A ->205A       | 0.10474  |           |           |          |                                   |
| 190B ->199B       | 0.10266  |           |           |          |                                   |
| 192B ->195B       | 0.47571  |           |           |          |                                   |
| 192B ->198B       | -0.13260 |           |           |          |                                   |
| 192B ->199B       | 0.44705  |           |           |          |                                   |
| 194B ->205B       | 0.10474  |           |           |          |                                   |
| Excited State 42: | 1.000-A  | 3.3099 eV | 374.58 nm | f=0.1555 | $\langle S^{**2} \rangle = 0.000$ |
| 194A ->201A       | 0.11732  |           |           |          |                                   |
| 194A ->202A       | 0.12050  |           |           |          |                                   |

|                                                                     |          |
|---------------------------------------------------------------------|----------|
| 194A ->205A                                                         | 0.62929  |
| 194A ->207A                                                         | -0.17246 |
| 194B ->201B                                                         | 0.11732  |
| 194B ->202B                                                         | 0.12050  |
| 194B ->205B                                                         | 0.62929  |
| 194B ->207B                                                         | -0.17246 |
| Excited State 57: 1.000-A 3.9398 eV 314.70 nm f=0.0427 <S**2>=0.000 |          |
| 185A ->195A                                                         | 0.12225  |
| 186A ->195A                                                         | 0.17620  |
| 187A ->195A                                                         | 0.43183  |
| 189A ->196A                                                         | 0.37682  |
| 192A ->197A                                                         | 0.12765  |
| 193A ->198A                                                         | 0.23525  |
| 185B ->195B                                                         | 0.12225  |
| 186B ->195B                                                         | 0.17620  |
| 187B ->195B                                                         | 0.43183  |
| 189B ->196B                                                         | 0.37682  |
| 192B ->197B                                                         | 0.12765  |
| 193B ->198B                                                         | 0.23525  |
| Excited State 61: 1.000-A 3.9713 eV 312.20 nm f=0.5187 <S**2>=0.000 |          |
| 186A ->195A                                                         | -0.11337 |
| 187A ->195A                                                         | -0.22005 |
| 188A ->195A                                                         | 0.12769  |
| 189A ->195A                                                         | 0.13083  |
| 189A ->196A                                                         | 0.51905  |
| 192A ->197A                                                         | -0.17479 |
| 193A ->198A                                                         | -0.21082 |
| 194A ->200A                                                         | -0.12189 |
| 186B ->195B                                                         | -0.11337 |
| 187B ->195B                                                         | -0.22005 |
| 188B ->195B                                                         | 0.12768  |
| 189B ->195B                                                         | 0.13083  |
| 189B ->196B                                                         | 0.51905  |
| 192B ->197B                                                         | -0.17479 |
| 193B ->198B                                                         | -0.21082 |
| 194B ->200B                                                         | -0.12189 |
| Excited State 66: 1.000-A 4.0491 eV 306.20 nm f=0.0604 <S**2>=0.000 |          |
| 187A ->195A                                                         | -0.10239 |
| 192A ->197A                                                         | -0.36473 |
| 193A ->197A                                                         | 0.50210  |
| 193A ->198A                                                         | 0.24066  |
| 187B ->195B                                                         | -0.10239 |
| 192B ->197B                                                         | -0.36473 |
| 193B ->197B                                                         | 0.50209  |
| 193B ->198B                                                         | 0.24067  |
| Excited State 70: 1.000-A 4.1022 eV 302.24 nm f=0.0780 <S**2>=0.000 |          |
| 189A ->195A                                                         | 0.29452  |
| 192A ->197A                                                         | -0.30587 |
| 192A ->198A                                                         | 0.10104  |
| 193A ->197A                                                         | -0.34928 |

|                                                                     |          |
|---------------------------------------------------------------------|----------|
| 193A ->198A                                                         | 0.35788  |
| 193A ->199A                                                         | 0.12768  |
| 189B ->195B                                                         | 0.29451  |
| 192B ->197B                                                         | -0.30587 |
| 192B ->198B                                                         | 0.10104  |
| 193B ->197B                                                         | -0.34928 |
| 193B ->198B                                                         | 0.35788  |
| 193B ->199B                                                         | 0.12768  |
| Excited State 81: 1.000-A 4.1827 eV 296.42 nm f=0.1763 <S**2>=0.000 |          |
| 185A ->196A                                                         | -0.25170 |
| 186A ->195A                                                         | 0.11907  |
| 186A ->196A                                                         | 0.56520  |
| 187A ->196A                                                         | -0.18336 |
| 194A ->209A                                                         | 0.13646  |
| 185B ->196B                                                         | -0.25170 |
| 186B ->195B                                                         | 0.11907  |
| 186B ->196B                                                         | 0.56521  |
| 187B ->196B                                                         | -0.18336 |
| 194B ->209B                                                         | 0.13645  |
| Excited State 82: 1.000-A 4.2030 eV 294.99 nm f=0.1613 <S**2>=0.000 |          |
| 181A ->195A                                                         | 0.16866  |
| 182A ->195A                                                         | -0.15878 |
| 184A ->195A                                                         | 0.43280  |
| 184A ->197A                                                         | -0.11176 |
| 187A ->195A                                                         | -0.23141 |
| 192A ->197A                                                         | 0.18850  |
| 193A ->198A                                                         | 0.23557  |
| 181B ->195B                                                         | 0.16864  |
| 182B ->195B                                                         | -0.15879 |
| 184B ->195B                                                         | 0.43281  |
| 184B ->197B                                                         | -0.11177 |
| 187B ->195B                                                         | -0.23140 |
| 192B ->197B                                                         | 0.18847  |
| 193B ->198B                                                         | 0.23560  |
| Excited State 86: 1.000-A 4.2392 eV 292.47 nm f=0.1136 <S**2>=0.000 |          |
| 182A ->196A                                                         | 0.12078  |
| 185A ->195A                                                         | 0.12587  |
| 185A ->196A                                                         | 0.54163  |
| 186A ->196A                                                         | 0.10774  |
| 187A ->196A                                                         | -0.34258 |
| 182B ->196B                                                         | 0.12078  |
| 185B ->195B                                                         | 0.12587  |
| 185B ->196B                                                         | 0.54163  |
| 186B ->196B                                                         | 0.10774  |
| 187B ->196B                                                         | -0.34258 |
| Excited State 92: 1.000-A 4.3136 eV 287.43 nm f=0.2432 <S**2>=0.000 |          |
| 181A ->195A                                                         | 0.13371  |
| 183A ->195A                                                         | 0.10541  |
| 184A ->195A                                                         | 0.35673  |
| 185A ->195A                                                         | -0.13865 |

|             |          |
|-------------|----------|
| 186A ->195A | -0.18171 |
| 187A ->195A | 0.36730  |
| 192A ->197A | -0.22852 |
| 193A ->198A | -0.17665 |
| 181B ->195B | 0.13373  |
| 183B ->195B | 0.10541  |
| 184B ->195B | 0.35673  |
| 185B ->195B | -0.13866 |
| 186B ->195B | -0.18171 |
| 187B ->195B | 0.36730  |
| 192B ->197B | -0.22853 |
| 193B ->198B | -0.17665 |

Excited State 98: 1.000-A 4.3439 eV 285.42 nm f=0.2447 <S\*\*2>=0.000

|             |          |
|-------------|----------|
| 183A ->195A | 0.16575  |
| 184A ->195A | 0.11306  |
| 185A ->195A | 0.40574  |
| 186A ->195A | 0.36537  |
| 190A ->197A | 0.11518  |
| 192A ->197A | -0.21713 |
| 192A ->198A | 0.10888  |
| 193A ->198A | -0.18509 |
| 183B ->195B | 0.16575  |
| 184B ->195B | 0.11306  |
| 185B ->195B | 0.40574  |
| 186B ->195B | 0.36537  |
| 190B ->197B | 0.11518  |
| 192B ->197B | -0.21713 |
| 192B ->198B | 0.10888  |
| 193B ->198B | -0.18509 |

Excited State 151: 1.000-A 5.0139 eV 247.28 nm f=0.0221 <S\*\*2>=0.000

|             |          |
|-------------|----------|
| 176A ->195A | 0.12587  |
| 177A ->195A | 0.10666  |
| 183A ->197A | 0.23762  |
| 183A ->198A | -0.21955 |
| 187A ->197A | 0.27209  |
| 187A ->199A | 0.11522  |
| 188A ->197A | 0.14348  |
| 188A ->198A | 0.11823  |
| 189A ->197A | 0.35057  |
| 189A ->198A | 0.13195  |
| 176B ->195B | 0.12587  |
| 177B ->195B | 0.10668  |
| 183B ->197B | 0.23762  |
| 183B ->198B | -0.21956 |
| 187B ->197B | 0.27209  |
| 187B ->199B | 0.11522  |
| 188B ->197B | 0.14347  |
| 188B ->198B | 0.11823  |
| 189B ->197B | 0.35066  |
| 189B ->198B | 0.13198  |

Excited State 156: 1.000-A 5.1131 eV 242.48 nm f=0.0226 <S\*\*2>=0.000

|                    |          |           |           |          |              |
|--------------------|----------|-----------|-----------|----------|--------------|
| 186A ->197A        | -0.10800 |           |           |          |              |
| 187A ->198A        | -0.25571 |           |           |          |              |
| 187A ->199A        | -0.10053 |           |           |          |              |
| 189A ->198A        | 0.55504  |           |           |          |              |
| 189A ->199A        | 0.13823  |           |           |          |              |
| 186B ->197B        | -0.10800 |           |           |          |              |
| 187B ->198B        | -0.25571 |           |           |          |              |
| 187B ->199B        | -0.10053 |           |           |          |              |
| 189B ->198B        | 0.55503  |           |           |          |              |
| 189B ->199B        | 0.13822  |           |           |          |              |
| Excited State 160: | 1.000-A  | 5.1409 eV | 241.17 nm | f=0.0416 | <S**2>=0.000 |
| 171A ->195A        | 0.11191  |           |           |          |              |
| 176A ->195A        | -0.10437 |           |           |          |              |
| 177A ->199A        | -0.23483 |           |           |          |              |
| 183A ->197A        | -0.14426 |           |           |          |              |
| 183A ->198A        | 0.24146  |           |           |          |              |
| 184A ->197A        | 0.12328  |           |           |          |              |
| 185A ->198A        | 0.14987  |           |           |          |              |
| 186A ->198A        | 0.17448  |           |           |          |              |
| 187A ->198A        | 0.29508  |           |           |          |              |
| 187A ->199A        | 0.10841  |           |           |          |              |
| 189A ->198A        | 0.23177  |           |           |          |              |
| 171B ->195B        | 0.11191  |           |           |          |              |
| 176B ->195B        | -0.10437 |           |           |          |              |
| 177B ->199B        | -0.23483 |           |           |          |              |
| 183B ->197B        | -0.14426 |           |           |          |              |
| 183B ->198B        | 0.24146  |           |           |          |              |
| 184B ->197B        | 0.12329  |           |           |          |              |
| 185B ->198B        | 0.14987  |           |           |          |              |
| 186B ->198B        | 0.17447  |           |           |          |              |
| 187B ->198B        | 0.29508  |           |           |          |              |
| 187B ->199B        | 0.10841  |           |           |          |              |
| 189B ->198B        | 0.23174  |           |           |          |              |
| Excited State 171: | 1.000-A  | 5.1990 eV | 238.48 nm | f=0.0458 | <S**2>=0.000 |
| 176A ->195A        | 0.49232  |           |           |          |              |
| 178A ->195A        | -0.16545 |           |           |          |              |
| 187A ->197A        | -0.11876 |           |           |          |              |
| 193A ->200A        | 0.36966  |           |           |          |              |
| 176B ->195B        | 0.49231  |           |           |          |              |
| 178B ->195B        | -0.16546 |           |           |          |              |
| 187B ->197B        | -0.11876 |           |           |          |              |
| 193B ->200B        | 0.36959  |           |           |          |              |
| Excited State 173: | 1.000-A  | 5.2064 eV | 238.14 nm | f=0.0213 | <S**2>=0.000 |
| 176A ->195A        | -0.30573 |           |           |          |              |
| 187A ->197A        | 0.13148  |           |           |          |              |
| 193A ->200A        | 0.57916  |           |           |          |              |
| 176B ->195B        | -0.30572 |           |           |          |              |
| 187B ->197B        | 0.13148  |           |           |          |              |
| 193B ->200B        | 0.57930  |           |           |          |              |
| Excited State 174: | 1.000-A  | 5.2231 eV | 237.38 nm | f=0.0224 | <S**2>=0.000 |

|             |          |
|-------------|----------|
| 182A ->198A | 0.17612  |
| 184A ->198A | 0.13136  |
| 185A ->197A | 0.31536  |
| 185A ->198A | -0.20467 |
| 186A ->197A | 0.25815  |
| 186A ->198A | -0.18244 |
| 187A ->197A | -0.21033 |
| 187A ->198A | 0.14409  |
| 189A ->198A | 0.24539  |
| 182B ->198B | 0.17612  |
| 184B ->198B | 0.13136  |
| 185B ->197B | 0.31537  |
| 185B ->198B | -0.20467 |
| 186B ->197B | 0.25816  |
| 186B ->198B | -0.18244 |
| 187B ->197B | -0.21033 |
| 187B ->198B | 0.14409  |
| 189B ->198B | 0.24539  |

Excited State 215: 1.000-A 5.4947 eV 225.64 nm f=0.0347 <S\*\*2>=0.000

|             |          |
|-------------|----------|
| 176A ->199A | -0.12304 |
| 184A ->198A | -0.10709 |
| 190A ->202A | 0.42757  |
| 190A ->203A | 0.28499  |
| 191A ->202A | 0.33816  |
| 191A ->203A | 0.21486  |
| 176B ->199B | -0.12304 |
| 184B ->198B | -0.10709 |
| 190B ->202B | 0.42757  |
| 190B ->203B | 0.28499  |
| 191B ->202B | 0.33815  |
| 191B ->203B | 0.21486  |

Excited State 255: 1.000-A 5.7077 eV 217.22 nm f=0.0219 <S\*\*2>=0.000

|             |          |
|-------------|----------|
| 171A ->195A | 0.12321  |
| 183A ->198A | -0.14586 |
| 183A ->199A | 0.50709  |
| 184A ->199A | -0.12237 |
| 185A ->199A | 0.22688  |
| 186A ->199A | -0.28658 |
| 171B ->195B | 0.12321  |
| 183B ->198B | -0.14586 |
| 183B ->199B | 0.50709  |
| 184B ->199B | -0.12237 |
| 185B ->199B | 0.22688  |
| 186B ->199B | -0.28658 |

Excited State 263: 1.000-A 5.7488 eV 215.67 nm f=0.0254 <S\*\*2>=0.000

|             |          |
|-------------|----------|
| 169A ->195A | -0.11964 |
| 170A ->195A | 0.61061  |
| 170A ->196A | -0.10015 |
| 177A ->197A | 0.10168  |
| 183A ->199A | 0.10702  |
| 169B ->195B | -0.11963 |

|                    |          |           |           |          |              |
|--------------------|----------|-----------|-----------|----------|--------------|
| 170B ->195B        | 0.61059  |           |           |          |              |
| 170B ->196B        | -0.10015 |           |           |          |              |
| 177B ->197B        | 0.10167  |           |           |          |              |
| 183B ->199B        | 0.10703  |           |           |          |              |
| Excited State 269: | 1.000-A  | 5.8005 eV | 213.75 nm | f=0.0439 | <S**2>=0.000 |
| 169A ->195A        | -0.10289 |           |           |          |              |
| 170A ->195A        | 0.12550  |           |           |          |              |
| 171A ->195A        | 0.40948  |           |           |          |              |
| 174A ->195A        | -0.13589 |           |           |          |              |
| 174A ->196A        | 0.10925  |           |           |          |              |
| 177A ->197A        | -0.22936 |           |           |          |              |
| 181A ->198A        | 0.19696  |           |           |          |              |
| 183A ->199A        | -0.16531 |           |           |          |              |
| 186A ->200A        | -0.12016 |           |           |          |              |
| 187A ->198A        | -0.11608 |           |           |          |              |
| 169B ->195B        | -0.10289 |           |           |          |              |
| 170B ->195B        | 0.12550  |           |           |          |              |
| 171B ->195B        | 0.40948  |           |           |          |              |
| 174B ->195B        | -0.13589 |           |           |          |              |
| 174B ->196B        | 0.10925  |           |           |          |              |
| 177B ->197B        | -0.22936 |           |           |          |              |
| 181B ->198B        | 0.19695  |           |           |          |              |
| 183B ->199B        | -0.16531 |           |           |          |              |
| 186B ->200B        | -0.12016 |           |           |          |              |
| 187B ->198B        | -0.11608 |           |           |          |              |
| Excited State 270: | 1.000-A  | 5.8085 eV | 213.45 nm | f=0.0342 | <S**2>=0.000 |
| 171A ->195A        | -0.13321 |           |           |          |              |
| 177A ->197A        | 0.15739  |           |           |          |              |
| 177A ->198A        | -0.10177 |           |           |          |              |
| 180A ->198A        | -0.11093 |           |           |          |              |
| 181A ->197A        | -0.30973 |           |           |          |              |
| 181A ->198A        | 0.42219  |           |           |          |              |
| 181A ->199A        | 0.13669  |           |           |          |              |
| 192A ->202A        | -0.12035 |           |           |          |              |
| 192A ->203A        | 0.17897  |           |           |          |              |
| 171B ->195B        | -0.13321 |           |           |          |              |
| 177B ->197B        | 0.15740  |           |           |          |              |
| 177B ->198B        | -0.10176 |           |           |          |              |
| 180B ->198B        | -0.11094 |           |           |          |              |
| 181B ->197B        | -0.30974 |           |           |          |              |
| 181B ->198B        | 0.42222  |           |           |          |              |
| 181B ->199B        | 0.13669  |           |           |          |              |
| 192B ->202B        | -0.12035 |           |           |          |              |
| 192B ->203B        | 0.17897  |           |           |          |              |
| Excited State 273: | 1.000-A  | 5.8302 eV | 212.66 nm | f=0.0955 | <S**2>=0.000 |
| 169A ->195A        | 0.18624  |           |           |          |              |
| 171A ->195A        | 0.18618  |           |           |          |              |
| 177A ->197A        | 0.36444  |           |           |          |              |
| 180A ->197A        | 0.13712  |           |           |          |              |
| 186A ->201A        | -0.14046 |           |           |          |              |
| 189A ->203A        | 0.12336  |           |           |          |              |

|             |          |
|-------------|----------|
| 192A ->202A | 0.14806  |
| 192A ->203A | -0.21813 |
| 192A ->206A | -0.14414 |
| 193A ->208A | 0.10326  |
| 169B ->195B | 0.18624  |
| 171B ->195B | 0.18618  |
| 177B ->197B | 0.36444  |
| 180B ->197B | 0.13712  |
| 186B ->201B | -0.14046 |
| 189B ->203B | 0.12336  |
| 192B ->202B | 0.14805  |
| 192B ->203B | -0.21812 |
| 192B ->206B | -0.14414 |
| 193B ->208B | 0.10326  |

Excited State 274: 1.000-A 5.8305 eV 212.65 nm f=0.0269 <S\*\*2>=0.000

|             |          |
|-------------|----------|
| 177A ->197A | 0.11743  |
| 185A ->201A | -0.10834 |
| 186A ->200A | 0.10043  |
| 186A ->201A | 0.33479  |
| 187A ->201A | -0.14298 |
| 189A ->202A | 0.21829  |
| 189A ->203A | -0.28204 |
| 192A ->203A | -0.14360 |
| 194A ->220A | 0.11901  |
| 194A ->222A | -0.14291 |
| 177B ->197B | 0.11743  |
| 185B ->201B | -0.10834 |
| 186B ->200B | 0.10043  |
| 186B ->201B | 0.33479  |
| 187B ->201B | -0.14298 |
| 189B ->202B | 0.21829  |
| 189B ->203B | -0.28204 |
| 192B ->203B | -0.14360 |
| 194B ->220B | 0.11902  |
| 194B ->222B | -0.14291 |

---



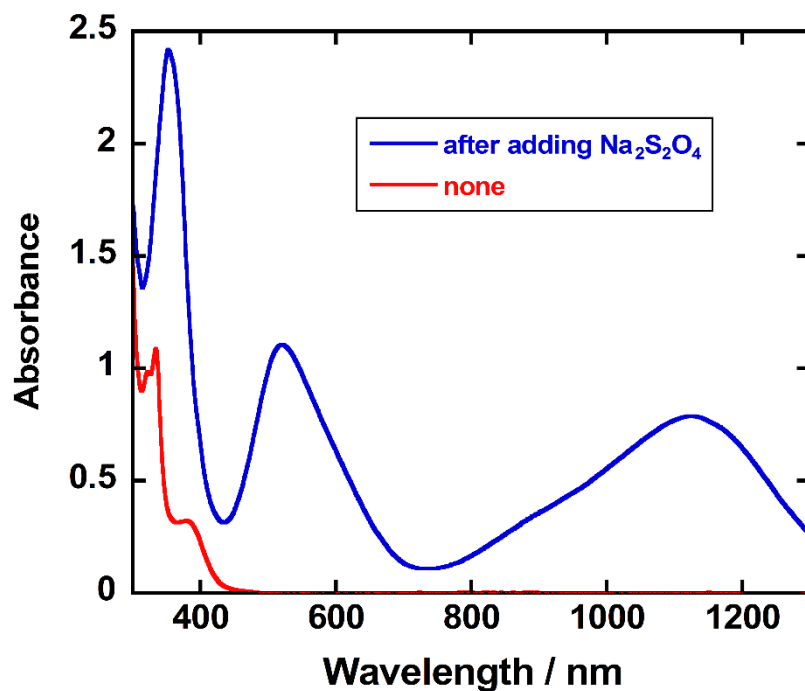

**Fig. S6** A spectral change of an aqueous acetate buffer solution (pH 5.0; at 20 °C under Ar) containing 0.1 mM  $[\text{PtCl}_2(\text{bpyMV2})]^{4+}$ , 0.1 M NaCl, and 30 mM EDTA by adding ca. 0.24 mg (1.38  $\mu\text{mol}$ ) of  $\text{Na}_2\text{S}_2\text{O}_4$ .

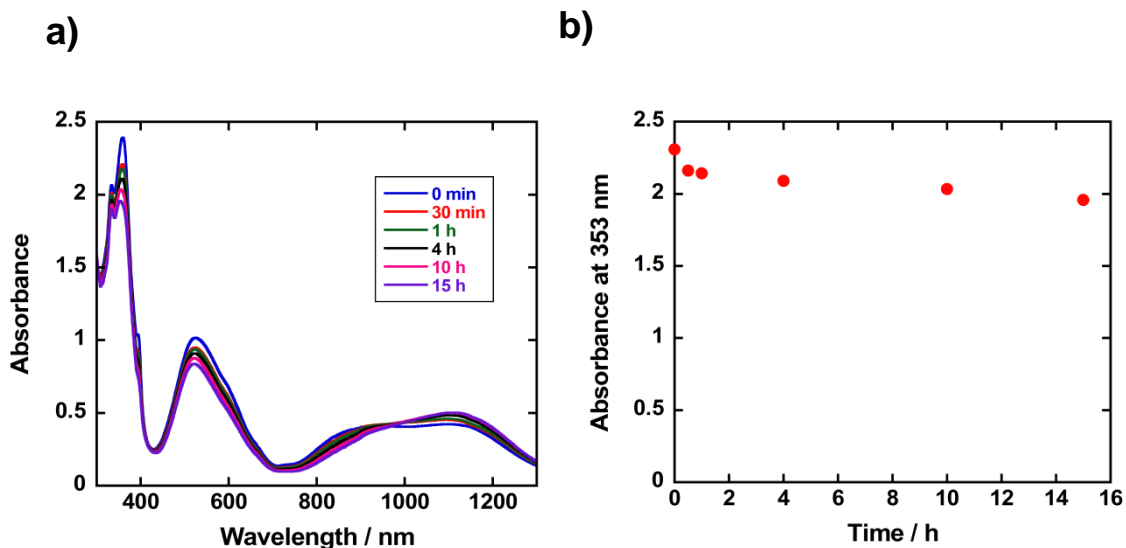

**Fig. S7** a) Spectral changes observed for an aqueous acetate buffer solution (pH 5.0; at 20 °C under Ar) containing 0.1 mM  $[\text{PtCl}_2(\text{bpyMV2})]^{4+}$ , 0.1 M NaCl, and 30 mM EDTA in the dark after visible light irradiation ( $400 < \lambda < 800 \text{ nm}$ ) for 10 min. b) Change in absorbance at 353 nm, taken from the spectral changes in Fig. S7a.

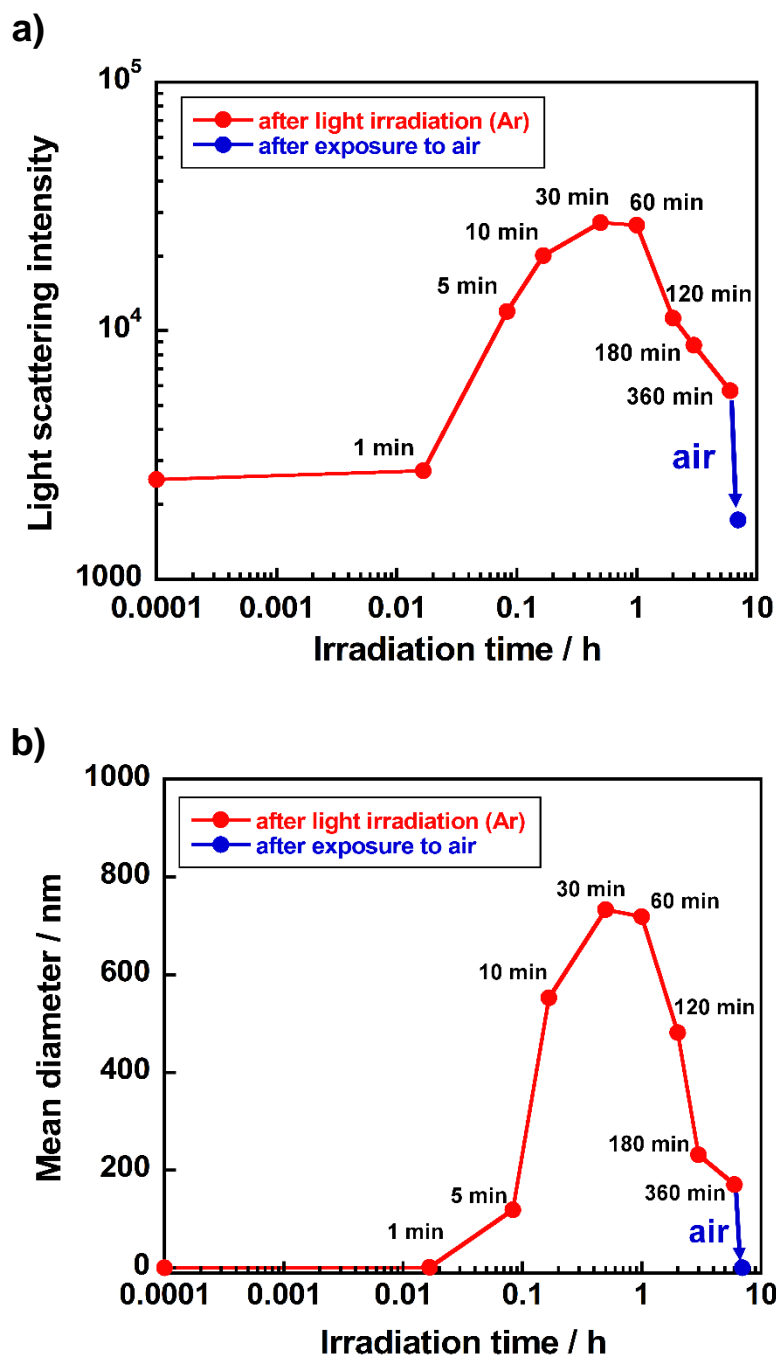

**Fig. S8** DLS measurements during the photolysis of an aqueous acetate buffer solution (pH 5.0; at 20 °C under Ar) containing 0.1 mM  $[\text{PtCl}_2(\text{bpyMV}2)]^{4+}$ , 0.1 M NaCl, and 30 mM EDTA. a) Changes in light scattering intensity during the photolysis. b) Changes in a mean diameter of particles dispersed during the photolysis. The maximum particle size seen here (ca. 800 nm) is much larger than those of the platinum nanoparticles given from  $\text{K}_2\text{PtCl}_4$  under similar experimental conditions (ca. 200 nm; data not shown).

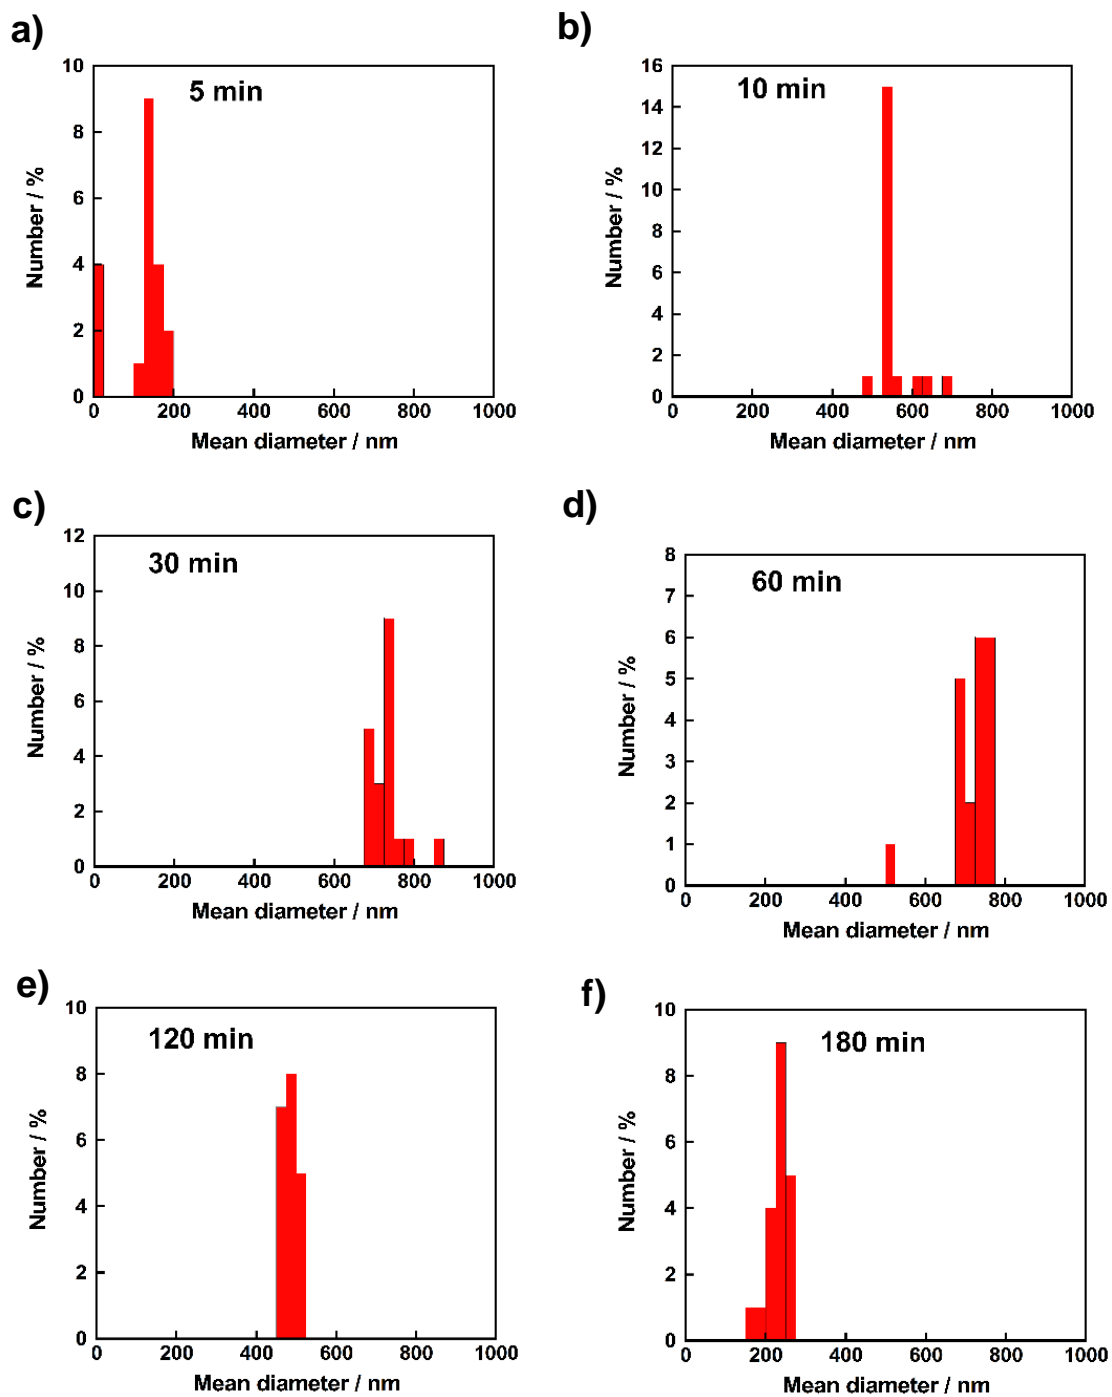

**Fig. S9** The particle size distribution of unidentified particles generated during the photolysis experiments shown in Fig. S8 at a) 5 min, b) 10 min, c) 30 min, d) 60 min, e) 120 min, and f) 180 min.

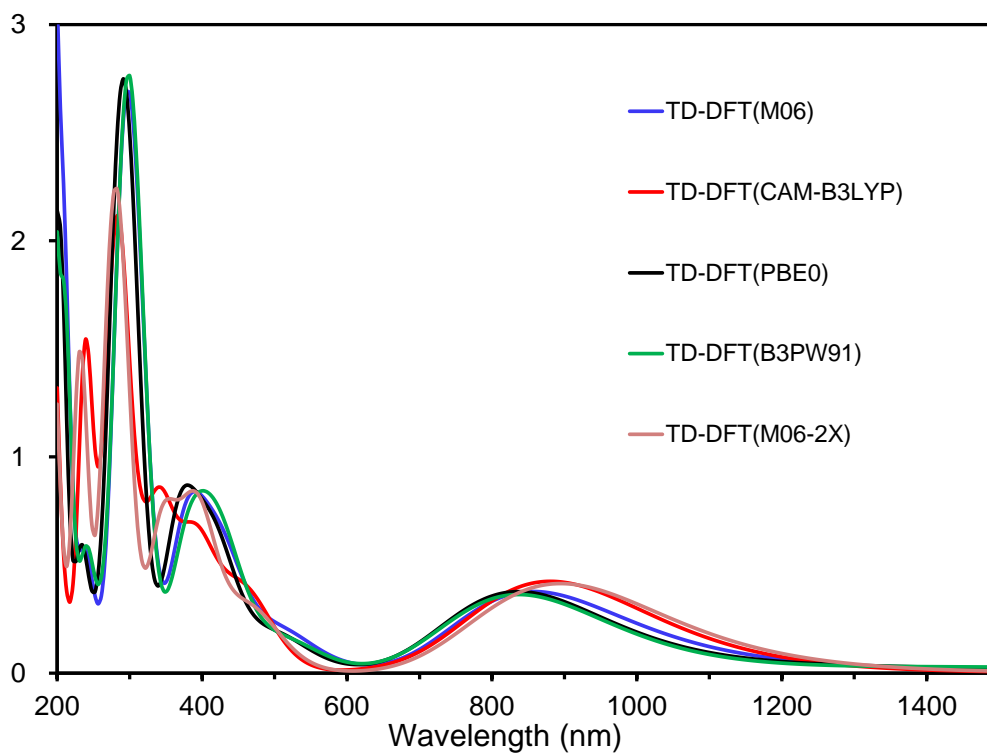

**Fig. S10** Spectral features simulated based on the TD-DFT calculations using several different functionals, such as M06, CAM-B3LYP, PBE0, P3PW91, and M06-2X, where the structure of  $[\text{PtCl}_2(\text{bpy})-(\text{MV}^+)_2]^{2+}$  (closed-shell singlet) employed was that optimized at the M06/SDD(Pt)/6-31G\*\*(HCNOCl)/PCM level of DFT. The results given for the open-shell singlet states were identical to those given for the corresponding closed-shell singlet states and have been thereby omitted in this figure.

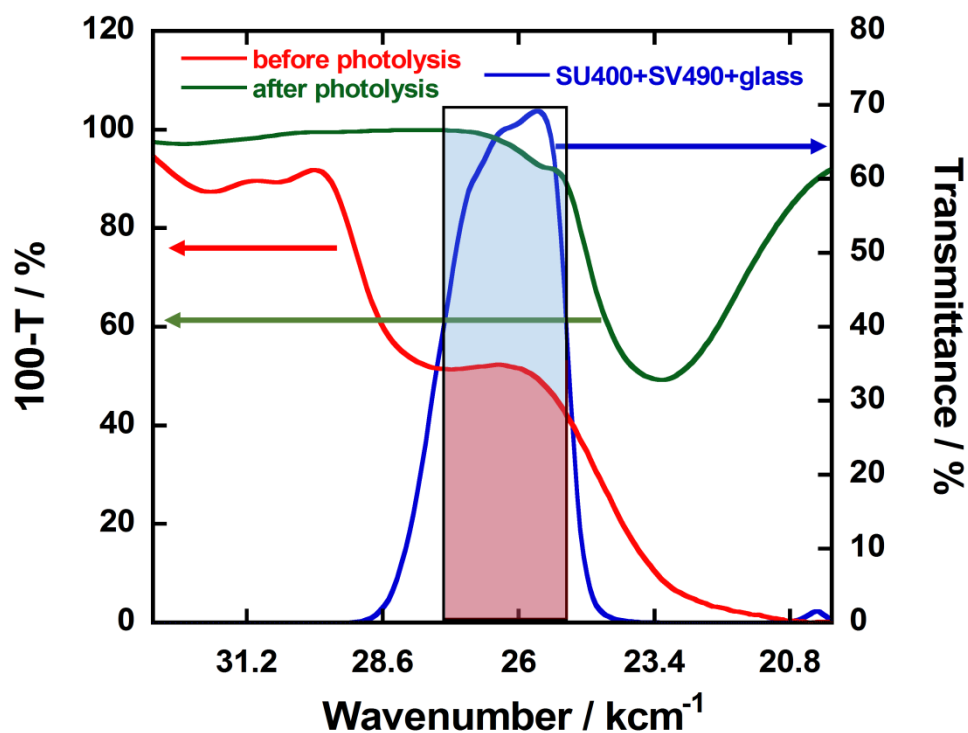

**Fig. S11** Transmittance property for the employed combination of glass filters is shown by a blue line (this include the transmittance component of the Pyrex glass vial employed in the measurement). The red and green lines correspond to the absorption properties of non-reduced and two-electron-reduced species. With this feature, it was estimated that 53% of the incident light absorbed by the two-electron-reduced species contribute to the excitation of the PtCl<sub>2</sub>(bpy)-based MLCT chromophore. As a result, the apparent quantum yield of H<sub>2</sub> formation was corrected by dividing it by this factor (i.e., 0.53).

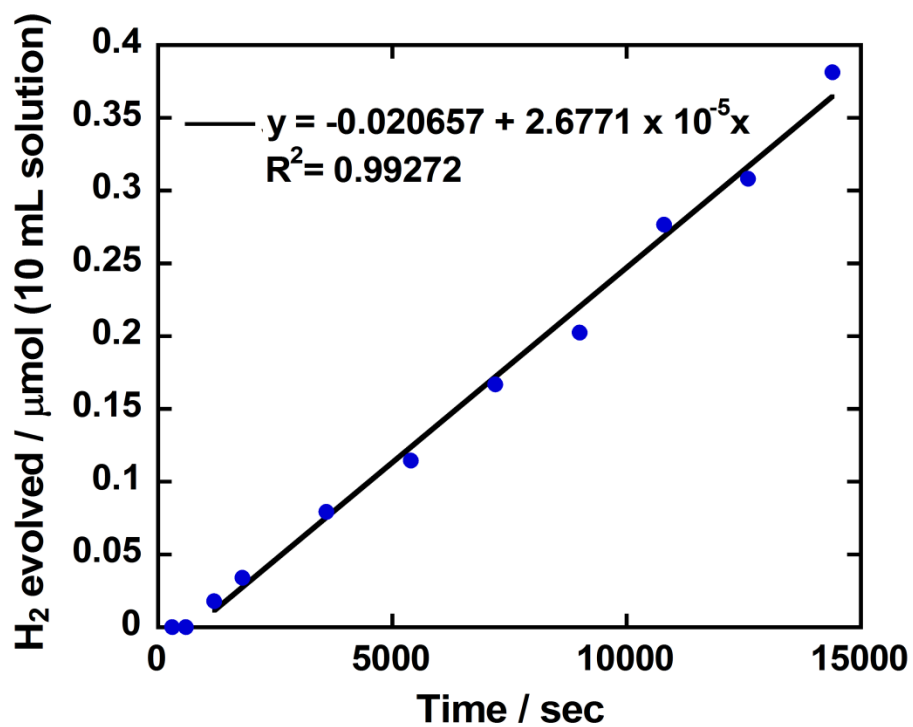

**Fig. S12** Photochemical H<sub>2</sub> production from an aqueous acetate buffer solution (pH 5.0, 10 mL; at 20 °C under Ar) containing 0.1 mM [PtCl<sub>2</sub>(bpyMV2)]<sup>4+</sup>, 0.1 M NaCl, and 30 mM EDTA, under photoirradiation in the 360-400 nm domain using the set of glass filters described in Fig. S11.

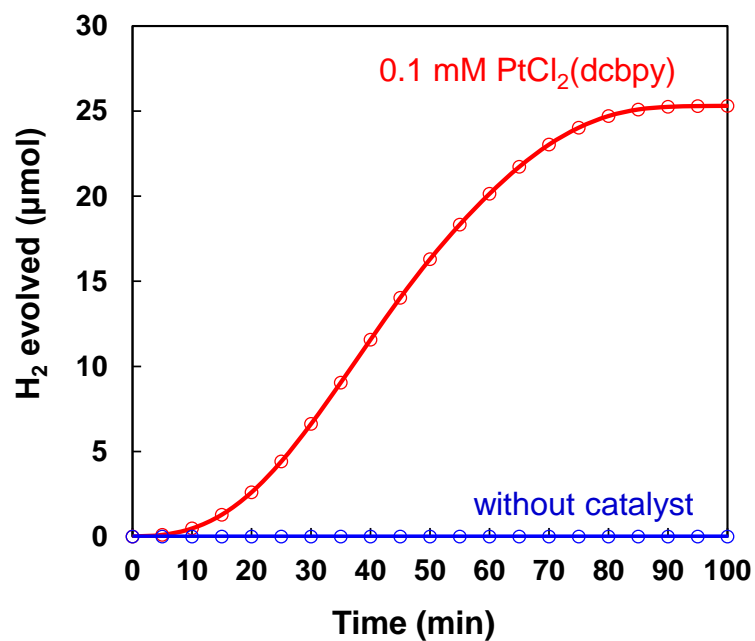

**Fig. S13** Thermal hydrogen production after mixing MV<sup>+</sup> (68 μmol; 1.5 mM) with PtCl<sub>2</sub>(dcbpy) (4.5 μmol; 0.1 mM) in an aqueous acetate buffer solutions containing 0.03 M CH<sub>3</sub>COOH, 0.07 M CH<sub>3</sub>COONa, and 0.1 M NaCl (pH 5.0, 45 mL) at 20 °C under Ar atmosphere. The solution of MV<sup>+</sup> was prepared by a bulk electrolysis of a solution of 5.0 mM [MV]Cl<sub>2</sub>·3H<sub>2</sub>O in the same buffer solution at -0.9 V vs. SCE. These experiments were performed as previously described.<sup>S20</sup>

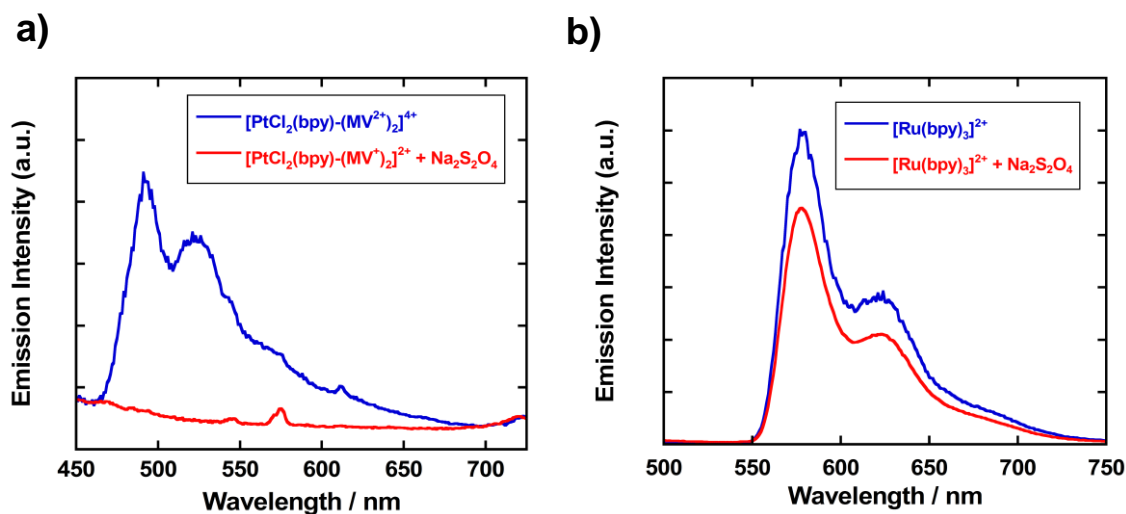

**Fig. S14** a) Emission spectra (excitation at 380 nm) of the non-reduced species  $[\text{PtCl}_2(\text{bpy})-(\text{MV}^{2+})_2]^{4+}$  (blue line) and the two-electron-reduced species  $[\text{PtCl}_2(\text{bpy})-(\text{MV}^+)_2]^{2+}$  (red line) generated by adding an excess of  $\text{Na}_2\text{S}_2\text{O}_4$ . The solution was prepared by dissolving the compound (0.01 mM) in a 1:2 mixture of aqueous acetate buffer (0.1 M, pH 5.0) containing  $\text{NaCl}$  (0.1 M) and ethylene glycol (0.25 mL) and was sealed in a quartz EPR tube under He. Measurements were carried out at 77 K in a frozen glass, before and after adding  $\text{Na}_2\text{S}_2\text{O}_4$  (7 mg, 40  $\mu\text{mol}$ ). b) Emission spectra (excitation at 425 nm) of 0.01 mM  $[\text{Ru}(\text{bpy})_3](\text{NO}_3)_2 \cdot 3\text{H}_2\text{O}$  before (blue line) and after (red line) adding  $\text{Na}_2\text{S}_2\text{O}_4$ . The solution was prepared by dissolving the compound in a 1:2 mixture of water and ethylene glycol (0.25 mL) and was sealed in a quartz EPR tube under He. Other conditions are same to those described above. Note that the emission intensity was quite sensitive to the manually tuned position of each sample so that quantitative comparison of the emission intensities does not make sense. Judging from the results in Fig. S14b, we rule out the quenching of a  $^3\text{MLCT}$  state by the presence of  $\text{Na}_2\text{S}_2\text{O}_4$ , leading to our conclusion that the  $^3\text{MLCT}$  state generated within the two-electron-reduced species  $[\text{PtCl}_2(\text{bpy})-(\text{MV}^+)_2]^{2+}$  is effectively self-quenched by the  $(\text{MV}^+)_2$   $\pi$ -dimer unit tethered to the  $\text{PtCl}_2(\text{bpy})$  moiety in a close contact.



## References

- [S1] A. R. Oki and R. J. Morgan, *Synth. Commun.*, 1995, **25**, 4093.
- [S2] L. A. Kelly, and M. A. J. Rodgers, *J. Phys. Chem.*, 1994, **98**, 6386.
- [S3] J. H. Price, A. N. Williamson, R. F. Schramm and B. B. Wayland, *Inorg. Chem.*, 1972, **11**, 1280.
- [S4] H. Ozawa, M. Haga, and K. Sakai, *J. Am. Chem. Soc.*, 2006, **128**, 4926.
- [S5] K. Sakai, Y. Kizaki, T. Tsubomura and K. Matumoto, *J. Mol. Catal.*, 1993, **79**, 141.
- [S6] M. Kobayashi, S. Masaoka and K. Sakai, *Dalton Trans.*, 2012, **41**, 4903.
- [S7] M. J. Frisch *et al.*, Gaussian 09 Revision C.01 (Gaussian Inc., Wallingford CT, 2009).
- [S8] Y. Zhao and D. G. Truhlar, *Theor. Chem. Acc.*, 2008, **120**, 215.
- [S9] Y. Zhao and D. G. Truhlar, *J. Phys. Chem. A*, 2008, **112**, 1095.
- [S10] Y. Zhao and D. G. Truhlar, *Acc. Chem. Res.*, 2008, **41**, 157.
- [S11] V. Barone, M. Cossi and J. Tomasi, *J. Comp. Chem.*, 1998, **19**, 404.
- [S12] M. Cossi, G. Scalmani, N. Rega and V. Barone, *J. Chem. Phys.*, 2002, **117**, 43.
- [S13] J. Tomasi, B. Mennucci and R. Cammi, *Chem. Rev.*, 2005, **105**, 2999.
- [S14] M. E. Casida, C. Jamorski, K. C. Casida and D. R. Salahub, *J. Chem. Phys.*, 1998, **108**, 4439.
- [S15] R. E. Stratmann, G. E. Scuseria and M. J. Frisch, *J. Chem. Phys.*, 1998, **109**, 8218.
- [S16] R. Bauernschmitt and R. Ahlrichs, *Chem. Phys. Lett.*, 1996, **256**, 454.
- [S17] GaussView, Version 5, R. Dennington, T. Keith and J. Millam, *Semichem Inc.*, Shawnee Mission, KS, 2009.
- [S18] C. G. Hatchard and C. A. Parker, *Proc. R. Soc. London, Ser. A.*, 1956, **235**, 518-536.
- [S19] D. R. James, Y.-S. Liu, P. De Mayo and W. R. Ware, *Chem. Phys. Lett.*, **1985**, *120*, 460-465.
- [S20] K. Yamauchi, S. Masaoka, and K. Sakai, *J. Am. Chem. Soc.*, **2009**, *131*, 8404-8406.
